1 **Role of microRNA-21 in hypertrophic cardiac**  
2 **remodeling**

3

4 Ken Watanabe<sup>1</sup>, Taro Narumi<sup>\*2</sup>, Tetsu Watanabe<sup>1</sup>, Yoichiro Otaki<sup>3</sup>, Tetsuya Takahashi<sup>1</sup>,

5 Tomonori Aono<sup>1</sup>, Jun Goto<sup>1</sup>, Taku Toshima<sup>1</sup>, Takayuki Sugai<sup>1</sup>, Masahiro Wanezaki<sup>1</sup>,

6 Daisuke Kutsuzawa<sup>4</sup>, Shigehiko Kato<sup>1</sup>, Harutoshi Tamura<sup>1</sup>, Satoshi Nishiyama<sup>1</sup>, Hiroki

7 Takahashi<sup>3</sup>, Takanori Arimoto<sup>1</sup>, Tetsuro Shishido<sup>1</sup>, Masafumi Watanabe<sup>1, 3, 4</sup>

8

9 <sup>1</sup> Department of Cardiology, Pulmonology, and Nephrology, Yamagata University  
10 School of Medicine, Yamagata, Japan.

11 <sup>2</sup> Department of Cardiology, Internal Medicine III, Hamamatsu University School of  
12 Medicine, Hamamatsu, Japan.

13 <sup>3</sup> Department of Advanced Cardiovascular Therapeutics, Yamagata University School  
14 of Medicine, Yamagata, Japan.

15 <sup>4</sup> Department of Advanced Heart Rhythm Therapeutics, Yamagata University School of  
16 Medicine, Yamagata, Japan.

17

18 **\*Address for correspondence:** Taro Narumi, MD, PhD

19 E-mail: [ajitaro910@gmail.com](mailto:ajitaro910@gmail.com) (TN)

## 20 **Abstract**

21 Hypertension is a major public health problem among with aging population worldwide.  
22 It causes cardiac remodeling, including hypertrophy and interstitial fibrosis, which leads  
23 to development of hypertensive heart disease (HHD). Although microRNA-21 (miR-21)  
24 is associated with fibrogenesis in multiple organs, its impact on hypertrophic cardiac  
25 remodeling in hypertension is not known. Circulating miR-21 level was higher in  
26 patients with HHD than that in the control subjects. It also positively correlated with  
27 serum myocardial fibrotic markers. MiR-21 expression levels were significantly  
28 upregulated in the mice hearts after angiotensin II (Ang II) infusion or transverse aortic  
29 constriction (TAC) compared with control mice. Expression level of programmed cell  
30 death 4 (PDCD4), a main target of miR-21, was significantly decreased in Ang II  
31 infused mice and TAC mice compared with control mice. Expression levels of  
32 transcriptional activator protein 1 (AP-1) and transforming growth factor- $\beta$ 1 (TGF- $\beta$ 1),  
33 which were downstream targets of PDCD4, were increased in Ang II infused mice and  
34 TAC mice compared with control mice. *In vitro*, mirVana-miR-21-specific inhibitor  
35 attenuated Ang II-induced PDCD4 downregulation and contributed to subsequent  
36 deactivation of AP-1/TGF- $\beta$ 1 signaling pathway in neonatal rat cardiomyocytes. Thus,  
37 suppression of miR-21 prevents hypertrophic cardiac remodeling by regulating PDCD4,

38 AP-1, and TGF- $\beta$ 1 signaling pathway.

## 39 **Introduction**

40 Hypertension is a major public health concern among the elderly population worldwide.

41 It is associated with increased risk of adverse cardiovascular events [1]. An

42 epidemiological report indicated that 31.1 % of adults in the world (1.39 billion people)

43 had hypertension in 2010 [2]. Hypertension increases the risk of developing

44 hypertension-induced organ damages, such as hypertensive heart disease (HHD),

45 hypertensive encephalopathy, and nephrosclerosis [3]. HHD is one of the most

46 important hypertension-induced organ damages [4]. According to the Framingham

47 Heart Study, 20 mmHg increase in systolic blood pressure contributes to 56% increased

48 risk for heart failure [5]. Furthermore, it was reported that HHD is a common

49 pathophysiology of heart failure with preserved ejection fraction [6, 7]. Hypertension

50 causes cardiac remodeling characterized by cardiac fibrosis, which contributes to

51 progression of heart failure [3, 4].

52 MicroRNAs (miRs) are small non-coding RNAs that regulate post-transcriptional

53 gene expressions. They have been shown to play an important role in fibrogenic process

54 in multiple organs [8]. In the present study, we focused on the fibrogenic function of

55 miR-21, which is a ubiquitously expressed miR that is reported to have a pivotal role in

56 development of tissue fibrosis [9]. Transforming growth factor- $\beta$ 1 (TGF- $\beta$ 1), a

57 pleiotropic and multifactorial cytokine involved in many biological processes, plays a  
58 crucial role in the pathogenesis of cardiac remodeling in hypertension [10]. It has been  
59 demonstrated that miR-21 can promote TGF- $\beta$ 1 signaling [11, 12]. On the other hand,  
60 miR-21 has been found to be upregulated by TGF- $\beta$ 1 [13]. This interrelationship forms  
61 a positive feedback loop, which may exacerbate the fibrogenic process. Previous studies  
62 have also demonstrated the contribution of miR-21 in patients with aortic stenosis,  
63 hypertrophic cardiomyopathy, and dilated cardiomyopathy [14-16]. However, the  
64 impact of miR-21 on the pathogenesis of hypertrophic cardiac remodeling in  
65 hypertension is still not clear.

66 We hypothesized that miR-21 deteriorates hypertrophic cardiac remodeling by  
67 enhancing TGF- $\beta$ 1 signaling pathway through suppressing its target gene expression. In  
68 the present study, we investigated the following: (1) miR-21 expression levels in  
69 patients with HHD; (2) miR-21 expression levels and its downstream signaling in  
70 animal model of hypertrophic cardiac remodeling by transverse aortic constriction  
71 (TAC) or angiotensin II (Ang II) infusion; (3) the function of miR-21 in cardiac  
72 remodeling process in response to Ang II stimulation *in vitro*; (4) the therapeutic  
73 potential of miR-21 inhibitor in hypertrophic cardiac remodeling *in vitro*.

## 74 **Materials and Methods**

### 75 **Human studies**

76 The present study included 10 patients with HHD and 10 control patients who were  
77 assessed to rule out cardiomyopathy and heart failure, and had normal cardiac function  
78 (Table 1). Endomyocardial biopsies (EMBs) were collected from the patients who had  
79 left ventricular hypertrophy and suspected some types of cardiomyopathy. EMBs were  
80 taken from left ventricle with a total of 4 to 6 samples through the femoral arteries.  
81 EMBs were analyzed in 3 HHD patients who were excluded other cardiomyopathy  
82 based on EMBs and other clinical data, and 3 control patients who had transient left  
83 ventricular dysfunction and suspected myocarditis but were eventually ruled out  
84 cardiomyopathy. The final diagnosis of HHD were made by two expert cardiologists  
85 based on angiography, echocardiographic data, clinical background, and medical  
86 history. Written informed consent was obtained from all patients before the study. The  
87 protocol was performed in accordance to the Helsinki Declaration and was approved by  
88 the human investigations committee of Yamagata University School of Medicine.

89 **Table 1. Clinical characteristics of 10 control subjects and 10 HHD patients.**

| Variables                           | Control patients<br><i>n</i> = 10 | HHD patients<br><i>n</i> = 10 | <i>P</i> value |
|-------------------------------------|-----------------------------------|-------------------------------|----------------|
| Age (years old)                     | 61 ± 8                            | 58 ± 12                       | ns             |
| Male / Female                       | 6 / 4                             | 7 / 3                         | ns             |
| BMI (kg/m <sup>2</sup> )            | 23.7 ± 1.9                        | 26.1 ± 5.9                    | ns             |
| Hypertension, n (%)                 | 3 (30)                            | 10 (100)                      | <0.05          |
| Diabetes mellitus, n (%)            | 1 (10)                            | 6 (60)                        | <0.05          |
| Dyslipidemia, n (%)                 | 3 (30)                            | 4 (40)                        | ns             |
| NYHA functional class III-IV, n (%) | 0 (0)                             | 4 (40)                        | <0.05          |
| Echocardiographic data              |                                   |                               |                |
| LVEDD (mm)                          | 47 ± 5                            | 55 ± 9                        | <0.05          |
| LVEF (%)                            | 68 ± 6                            | 52 ± 14                       | <0.05          |
| IVSD (mm)                           | 9 ± 2                             | 14 ± 2                        | <0.05          |
| LVPWD (mm)                          | 10 ± 1                            | 13 ± 2                        | <0.05          |
| Blood examination                   |                                   |                               |                |
| eGFR (mL/min/1.73 m <sup>2</sup> )  | 92.0 ± 18.9                       | 56.3 ± 25.5                   | <0.05          |
| BNP (pg/mL)                         | 36 (17 - 70)                      | 463 (143 - 713)               | <0.05          |
| Medications                         |                                   |                               |                |
| ACEIs and/or ARBs, n (%)            | 3 (30)                            | 10 (100)                      | <0.05          |
| CCBs, n (%)                         | 1 (10)                            | 7 (70)                        | <0.05          |
| Diuretics, n (%)                    | 0 (0)                             | 6 (60)                        | <0.05          |
| Statins, n (%)                      | 3 (30)                            | 5 (50)                        | ns             |

90 Data are expressed as mean ± SD, number (percentage), or median (interquartile range).  
 91 ACEIs, angiotensin-converting enzyme inhibitors; ARBs, angiotensin II receptor  
 92 blockers; BMI, body mass index; BNP, B-type natriuretic peptide; CCBs, calcium-  
 93 channel blockers; eGFR, estimated glomerular filtration rate; HHD, hypertensive heart  
 94 disease; IVSD, interventricular septum diameter; LVEDD, left ventricular end-diastolic  
 95 diameter; LVEF, left ventricular ejection fraction; LVPWD, left ventricular posterior wall  
 96 diameter; NYHA, New York Heart Association.

97 **Measurement of circulating miR-21 levels and biochemical**  
98 **assays**

99 Blood samples were collected in the early morning within 24 hours after admission,  
100 centrifuged at 3000g for 15 min at 4 °C, and the obtained serum was stored at –80 °C.

101 Circulating miRs were isolated from 300 µL serum by using a NucleoSpin microRNA  
102 isolation kit (TaKaRa, Otsu, Japan).

103 Serum carboxy-terminal telopeptide of type I collagen (I-CTP) concentrations were  
104 determined by radioimmunoassay (Orion Diagnostica, Finland) [17]. Serum procollagen  
105 type III N-terminal propeptide (P3NP) levels were measured with enzyme-linked  
106 immunosorbent assay (ELISA) kit (MyBioSource, San Diego, CA, USA).

107

108 **Animal treatment regimens**

109 Hypertension-induced cardiac remodeling models were established by Ang II infusions  
110 or TAC surgery [18, 19]. Briefly, Ang II was infused with ALZET osmotic pumps (1.5  
111 mg/kg/day) as we previously described [18]. Cardiac function, dimension, and blood  
112 pressure were assessed after 2 weeks from Ang II infusion. The mice were sacrificed by  
113 intraperitoneal injection of a combination of ketamine (1g/kg) and xylazine (100  
114 mg/kg), and the heart samples were obtained for the biochemical and histopathological



115 study. TAC surgery was performed to induce chronic pressure overload as we  
116 previously described [20]. Briefly, 8- to 10-week-old mice were anesthetized by  
117 intraperitoneal injection with a mixture of ketamine (80 mg/kg) and xylazine (8 mg/kg).  
118 Animals were intubated and ventilated with a rodent ventilator (Harvard Apparatus,  
119 Holliston, MA, USA). The transverse aortic arch was ligated (7-0 prolene) between the  
120 right innominate and left common carotid arteries with a 27-gauge needle, and then the  
121 needle was promptly removed leaving a discrete region of stenosis. Cardiac remodeling  
122 was assessed after 4 weeks from surgery. All experimental procedures were performed  
123 according to the animal welfare regulations of Yamagata University School of  
124 Medicine, and the study protocol was approved by the Animal Subjects Committee of  
125 Yamagata University School of Medicine. The investigation conformed to the Guide for  
126 the Care and Use of Laboratory Animals published by the US National Institutes of  
127 Health (NIH Publication, 8th Edition, 2011).

128

## 129 **Neonatal rat cardiomyocyte isolation, cell culture, and** 130 **treatment**

131 Isolation and culture of neonatal rat cardiomyocytes (NRCMs) were performed as we  
132 previously described [21]. Briefly, ventricles were obtained from 1- to 2-day-old

133 Sprague-Dawley rat pups after euthanasia by decapitation, and cardiomyocytes were  
134 isolated by digestion with collagenase. Cardiomyocytes were kept in serum-  
135 supplemented (10% fetal bovine serum, FBS) Dulbecco's Modified Eagle Medium  
136 (DMEM, Thermo Fisher Scientific, MA, USA). Primary culture of cardiofibroblasts  
137 were obtained as previously described [22]. Briefly, ventricles of Sprague-Dawley rat  
138 pups were digested with collagenase, and resuspended in DMEM with 10% FBS. Cells  
139 were then seeded into 10-cm culture dishes and cultured at 37 °C for 2h. Unattached  
140 cells were discarded, and attached cells were cultured in DMEM with 10% FBS.  
141 NRCMs were transfected with small interfering RNA (siRNA) specific for programmed  
142 cell death 4 (PDCD4) (Thermo Fisher Scientific), 10-nM mirVana hsa-miR-21 specific  
143 inhibitor (Thermo Fisher Scientific), or mirVana miRNA inhibitor Negative Control  
144 (Thermo Fisher Scientific) using Lipofectamine 3000 Reagent (Thermo Fisher  
145 Scientific) according to the manufacturer's instructions. The medium was replaced with  
146 DMEM with 10% FBS after transfection for 4h. NRCMs were stimulated with 1  $\mu$ M  
147 Ang II for 24 hours of serum starvation.

148

## 149 **Western blotting**

150 The total protein extracts were prepared with radio-immunoprecipitation assay (RIPA)

151 buffer as we previously reported [21]. Equal amounts of protein were subjected to 10%  
152 SDS-PAGE and transferred to polyvinylidene difluoride membranes. The membranes  
153 were probed overnight at 4 °C with the following primary antibodies: PDCD4 (Santa  
154 Cruz, Dallas, TX, USA, sc-376430), c-Jun (Cell Signaling Technology, Danvers, MA,  
155 USA, #9165), TGF- $\beta$ 1 (Cell Signaling Technology, #3711), phospho-transforming  
156 growth factor- $\beta$ -activated kinase 1 (p-TAK1) (Cell Signaling Technology, #4537),  
157 TAK1 (Cell Signaling Technology, #4505),  $\beta$ -tubulin (Cell Signaling Technology,  
158 #2146). Protein expression levels were normalized to that of  $\beta$ -tubulin.

159

## 160 **RNA extraction and quantitative reverse transcription**

### 161 **polymerase chain reaction (qRT-PCR)**

162 Total RNA was isolated from human endomyocardial biopsy specimens, mouse whole  
163 heart, and NRCMs using TRIzol reagent (Thermo Fisher Scientific) as we previously  
164 described [23]. For miRs screening assay, first strand cDNA of miRs was synthesized,  
165 and PCR reaction was performed using a miR-X miRNA qRT-PCR SYBR Kit  
166 (TaKaRa) according to the manufacturer's instructions. For other studies, first strand  
167 cDNA was synthesized using a Superscript IV First-strand cDNA synthesis kit (Thermo  
168 Fisher Scientific) and quantitative RT-PCR (qRT-PCR) was performed with SYBR

169 Green Real-Time PCR Master Mixes (Thermo Fisher Scientific) according to the  
170 manufacturer's instructions. Gene expressions was normalized to U6 for miR assay and  
171  $\beta$ -actin for other assays.

172

### 173 **Histopathological examinations**

174 Biopsy samples of human cardiomyocyte and mice heart samples were fixed with 4%  
175 formalin and embedded in paraffin. Sections of 3–5  $\mu$ m thickness were stained with  
176 hematoxylin-eosin (HE) or Massons's trichrome stain for histopathological analysis as  
177 we previously described [20]. The extent of myocardial interstitial fibrosis was  
178 evaluated using a microscope and attached software (BZ-X710; Keyence, Osaka,  
179 Japan).

180

### 181 **Statistical analysis**

182 All values are expressed as mean  $\pm$  standard error of mean (SEM). Statistical  
183 differences among groups were evaluated with one-way analysis of variance (ANOVA)  
184 followed by Tukey-Kramer post hoc tests. Correlations between the circulating miRs  
185 levels and biomarkers of cardiac fibrosis were analyzed by using Pearson's correlation  
186 coefficient. A value of  $P < 0.05$  was considered statistically significant. All statistical

187 analyses were performed with a standard software package (JMP version 12; SAS  
188 institute, Cary, NC, USA).

## 189 **Results**

### 190 **MiRs expression levels in patients with hypertensive heart** 191 **disease**

192 To investigate the expression levels of fibrosis-associated miRs according to previous  
193 report [24], we first measured the levels of circulating miR-21, miR-29, miR-30, and  
194 miR-133 in patients with HHD. Circulating miR-21 levels were significantly increased  
195 in patients with HHD compared with those of control subjects. On the other hand,  
196 circulating miR-29, miR-30, and miR-133 levels were significantly decreased in  
197 patients with HHD (Fig. 1A). HE and Masson's trichrome staining revealed that  
198 significant cardiac hypertrophy and fibrosis was observed in the heart section from  
199 patients with HHD (Fig. 1B). MiR-21 levels were significantly increased in the heart  
200 samples of patients with HHD compared with those of the normal subjects. In contrast,  
201 miR-29, miR-30, and miR-133 levels tended to be decreased in patients with HHD, but  
202 the differences were not statistically significant (Fig. 1C). We measured serum I-CTP  
203 and P3NP levels as markers of myocardial fibrosis [17, 25]. Serum I-CTP and P3NP  
204 levels were significantly higher in patients with HHD compared with those of control  
205 subjects (Fig. 1D). As shown in Fig. 1E, there were significant positive correlations  
206 between circulating miR-21 levels and serum I-CTP ( $R = 0.560$ ) and P3NP ( $R = 0.477$ ).

207 However, there were no significant correlations between other miRs and I-CTP (miR-  
208 29:  $R = -0.215$ ; miR-30:  $R = -0.068$ ; miR-133:  $R = 0.268$ ) and P3NP (miR-29:  $R =$   
209  $-0.302$ ; miR-30:  $R = -0.263$ ; miR-133:  $R = -0.138$ ) levels.

210

211 **Fig 1. Association between miRs expressions and cardiac remodeling in patients**

212 **with HHD.**

213 **(A)** Circulating miRs expressions in patients with HHD (n = 10 per group). **(B)**

214 Representative images and analysis of cardiac remodeling by HE and Masson's

215 trichrome staining in heart samples from HHD patients and normal subjects (n = 3 per

216 group). Scale bars = 20  $\mu\text{m}$ . **(C)** Expression of miRs levels in heart samples from

217 patients with HHD (n = 3 per group). **(D)** Serum I-CTP and P3NP levels in patients with

218 HHD. **(E)** Circulating miR-21 levels were positively correlated with serum I-CTP and

219 P3NP levels in patients with HHD. Data are expressed as mean  $\pm$  SEM. \* $P < 0.05$ , \*\* $P <$

220 0.01.

221

222 **MiR-21 expression levels in Ang II infused mice and TAC**

223 **mice**

224 MiR-21 expression levels were significantly increased in Ang II infused mice hearts

225 compared with those of sham mice (Fig. 2A). Cardiac remodeling was detected by HE  
226 and Masson's trichrome staining in Ang II infused mice hearts but not in sham mice  
227 (Fig. 2B). Alpha smooth muscle actin ( $\alpha$ -SMA) mRNA expression was significantly  
228 upregulated in the Ang II infused mice hearts compared with those of the sham mice  
229 (Fig. 2C). Similarly, miR-21 expression levels were significantly increased in the heart  
230 of TAC mice compared with those of sham-operated mice (Fig. 2D). Cardiac  
231 remodeling was also detected by HE and Masson's trichrome staining in TAC mice but  
232 not in the sham-operated mice (Fig. 2E).  $\alpha$ -SMA mRNA expression was significantly  
233 upregulated in the TAC mice hearts compared with those of the sham-operated mice  
234 (Fig. 2F). Echocardiographic and hemodynamic data of Ang II infused mice and TAC  
235 operated mice are shown in Table 2.

236

237 **Fig 2. The crucial role of miR-21 in cardiac remodeling in Ang II infused and TAC**  
238 **mice models.**

239 **(A)** MiR-21 expression levels in Ang II infused mice (n = 6 per group). **(B)**

240 Representative images and analysis of cardiac remodeling by HE and Masson's

241 trichrome staining in left ventricular sections in Ang II infused mice hearts (n = 6 per

242 group). Scale bars = 50  $\mu$ m. **(C)**  $\alpha$ -SMA expression in Ang II infused mice (n = 6 per



243 group). **(D)** MiR-21 expression levels in the heart samples of TAC-operated mice (n = 6  
 244 per group). **(E)** Representative images and analysis of cardiac remodeling by HE and  
 245 Masson's trichrome staining in left ventricular sections of the TAC-operated mice  
 246 hearts (n = 6 per group). Scale bars = 50  $\mu$ m. **(F)**  $\alpha$ -SMA expression in TAC-operated  
 247 mice (n = 6 per group). Data are expressed as mean  $\pm$  SEM. \* $P$  < 0.05, \*\* $P$  < 0.01.

248

249 **Table 2. Echocardiographic and hemodynamic data of Ang II infused mice and**  
 250 **TAC operated mice.**

|           | saline          | Ang II            | sham            | TAC                          |
|-----------|-----------------|-------------------|-----------------|------------------------------|
| LVEDD, mm | 3.19 $\pm$ 0.11 | 2.96 $\pm$ 0.08   | 3.06 $\pm$ 0.16 | 3.13 $\pm$ 0.15              |
| LVESD, mm | 1.79 $\pm$ 0.11 | 1.58 $\pm$ 0.09   | 1.66 $\pm$ 0.16 | 2.45 $\pm$ 0.14 <sup>†</sup> |
| IVSD, mm  | 0.76 $\pm$ 0.04 | 0.97 $\pm$ 0.03** | 0.66 $\pm$ 0.03 | 0.99 $\pm$ 0.02 <sup>†</sup> |
| LVPWD, mm | 0.80 $\pm$ 0.03 | 0.94 $\pm$ 0.02** | 0.72 $\pm$ 0.03 | 1.06 $\pm$ 0.03 <sup>†</sup> |
| FS, %     | 45.9 $\pm$ 2.1  | 46.9 $\pm$ 1.6    | 45.6 $\pm$ 2.3  | 22.2 $\pm$ 2.0 <sup>†</sup>  |
| HR, bpm   | 682 $\pm$ 22    | 628 $\pm$ 16      | 542 $\pm$ 23    | 554 $\pm$ 21                 |
| SBP, mmHg | 100 $\pm$ 4     | 139 $\pm$ 3**     |                 |                              |
| DBP, mmHg | 60 $\pm$ 6      | 79 $\pm$ 4*       |                 |                              |
| MBP, mmHg | 71 $\pm$ 5      | 99 $\pm$ 4**      |                 |                              |

251 Data are expressed as mean  $\pm$  SEM; n = 6 each; \* $P$  < 0.05 and \*\* $P$  < 0.01 compared with  
 252 saline infused mice; <sup>†</sup> $P$  < 0.01 compared with sham mice.

253 Ang II, angiotensin II; DBP, diastolic blood pressure; FS, fractional shortening; HR, heart  
 254 rate; IVSD, interventricular septum diameter; LVEDD, left ventricular end-diastolic  
 255 diameter; LVESD, left ventricular end-systolic diameter; LVPWD, left ventricular  
 256 posterior wall diameter; MBP, mean blood pressure; SBP, systolic blood pressure; TAC,  
 257 transverse aortic constriction.

258

## 259 **Modulation of miR-21 altered PDCD4 expression *in vivo***

260 MiR-21 has been implicated in fibrosis by suppressing its downstream genes, such as

261 PDCD4, smad family member 7 (Smad7), phosphatase and tensin homolog (PTEN),  
262 and sprouty 1 (Spry1) [12, 15, 26, 27]. We examined the mRNA expression levels of  
263 these targets using qRT-PCR in Ang II infused mice and TAC mice hearts. PDCD4  
264 mRNA levels were significantly downregulated in Ang II infused mice hearts compared  
265 with sham mice. PDCD4 mRNA levels were significantly lower in TAC mice hearts  
266 than in sham mice (Fig. 3A). Smad7 mRNA levels were significantly decreased in Ang  
267 II infused mice compared with sham mice, although there were no significant  
268 differences in PTEN and Spry1 mRNA levels between Ang II infused mice and sham  
269 mice (S1A Fig). There were no significant differences in Smad7, PTEN, and Spry1  
270 mRNA levels between TAC mice and sham mice (S1B Fig).

271 Since PDCD4 mRNA levels were consistently decreased in Ang II infused mice  
272 and TAC mice hearts, we focused on PDCD4. We next investigated PDCD4  
273 downstream target of transcription activator protein 1 (AP-1), a dimeric complex  
274 composed of c-Jun and c-Fos family, and TGF- $\beta$ 1 signaling pathway. AP-1 and TGF- $\beta$ 1  
275 mRNA levels were significantly upregulated in Ang II infused mice hearts compared  
276 with those of saline infused mice (Fig. 3B). PDCD4 protein expression was  
277 significantly decreased in Ang II infused mice hearts, whereas c-Jun and TGF- $\beta$ 1  
278 protein levels were significantly increased compared with those of saline infused mice

279 (Fig. 3C). AP-1 and TGF- $\beta$ 1 mRNA levels were significantly increased in the hearts of  
280 TAC mice compared with those of sham mice (Fig. 3D). Moreover, PDCD4 protein  
281 expression was significantly decreased in TAC mice hearts, whereas c-Jun and TGF- $\beta$ 1  
282 protein levels were significantly increased compared with those of sham mice (Fig. 3E).

283

284 **Fig 3. PDCD4 expression and its downstream signaling in Ang II- and TAC-**  
285 **induced cardiac remodeling.**

286 (A) PDCD4 mRNA expression in Ang II infused and TAC-operated mice (n = 6 per  
287 group). (B) AP-1 and TGF- $\beta$ 1 mRNA expressions in Ang II infused mice (n = 6 per  
288 group). (C) Protein expressions of PDCD4, c-Jun, and TGF- $\beta$ 1 in Ang II infused mice  
289 (n = 6 per group). (D) AP-1 and TGF- $\beta$ 1 mRNA expressions in TAC-operated mice (n  
290 = 6 per group). (E) Protein expressions of PDCD4, c-Jun, and TGF- $\beta$ 1 in TAC-operated  
291 mice (n = 6 per group). Representative images from at least six independent results are  
292 shown. Data are expressed as mean  $\pm$  SEM. \* $P < 0.05$ .

293

294 **The impact of miR-21 in cardiomyocytes under hypertrophic**  
295 **stimulation *in vitro***

296 MiR-21 expression levels were significantly increased in NRCMs under Ang II

297 stimulation (Fig. 4A). PDCD4 mRNA expression was significantly downregulated in  
298 NRCMs under Ang II stimulation (Fig. 4B). However, there were no significant  
299 differences in mRNA expression levels of Smad7, PTEN, and Spry1 in NRCMs (S2A  
300 Fig). The mRNA expression levels of PDCD4, Smad7, and Spry1 were significantly  
301 decreased in neonatal rat cardiofibroblasts under Ang II stimulation (S2B Fig). AP-1  
302 and TGF- $\beta$ 1 mRNA levels were significantly upregulated in NRCMs under Ang II  
303 stimulation (Fig. 4B). PDCD4 protein expressions were significantly decreased in  
304 NRCMs under Ang II stimulation, whereas its targets, c-Jun and TGF- $\beta$ 1 protein  
305 expression levels were significantly increased (Fig. 4C).

306 To verify whether PDCD4 directly interacts with AP-1 and subsequent  
307 downregulation of TGF- $\beta$ 1, we transfected siPDCD4 into NRCMs. PDCD4 knockdown  
308 significantly increased AP-1 and TGF- $\beta$ 1 mRNA levels (Fig. 4D). Western blot analysis  
309 also revealed that c-Jun and TGF- $\beta$ 1 protein expression levels were significantly  
310 increased by knockdown of PDCD4 (Fig. 4E).

311

312 **Fig 4. MiR-21 and PDCD4 expressions in cardiomyocytes under Ang II**  
313 **stimulation.**

314 (A) MiR-21 expressions in cardiomyocytes under Ang II stimulation for 24 h (n = 4–6

315 per group). **(B)** PDCD4, AP-1, and TGF- $\beta$ 1 mRNA expressions in cardiomyocytes  
316 under Ang II stimulation for 24 h (n = 4–6 per group). **(C)** Protein expression levels of  
317 PDCD4, c-Jun, and TGF- $\beta$ 1 in cardiomyocytes under Ang II stimulation for 24 h (n =  
318 4–6 per group). **(D)** AP-1 and TGF- $\beta$ 1 mRNA expressions in cardiomyocytes  
319 transfected with siPDCD4 (n = 4–6 per group). **(E)** Protein expressions of PDCD4, c-  
320 Jun, and TGF- $\beta$ 1 in cardiomyocytes transfected with siPDCD4 (n = 4–6 per group).  
321 Representative images from at least four independent results are shown. Data are  
322 expressed as mean  $\pm$  SEM. \* $P$  < 0.05.

323

324 To clarify the direct role of miR-21 in regulating PDCD4 expressions in NRCMs,  
325 we transfected mirVana-miR-21-specific inhibitor into NRCMs. MiR-21 inhibitor  
326 significantly upregulated PDCD4 mRNA expressions compared with negative control  
327 (Fig. 5A). AP-1 and TGF- $\beta$ 1 mRNA expressions were significantly downregulated in  
328 NRCMs with miR-21 inhibitor compared with those in the negative control. PDCD4  
329 protein expression levels were significantly increased in NRCMs with miR-21 inhibitor  
330 compared with those in the negative control, whereas its targets, c-Jun and TGF- $\beta$ 1  
331 protein expression levels were significantly decreased under miR-21 inhibitor  
332 transfection (Fig. 5B).

333

334 **Fig 5. The impact of miR-21 suppression on PDCD4, AP-1, and TGF- $\beta$ 1 signaling**  
335 **in cardiomyocytes.**

336 **(A)** Effect of miR-21 suppression on PDCD4, AP-1, and TGF- $\beta$ 1 mRNA expressions in  
337 cardiomyocytes (n = 4–6 per group). **(B)** Effect of miR-21 suppression on PDCD4, c-  
338 Jun, and TGF- $\beta$ 1 protein expressions in cardiomyocytes (n = 4–6 per group).

339 Representative images from at least four independent results are shown. Data are  
340 expressed as mean  $\pm$  SEM. \* $P$  < 0.05.

341

342 MiR-21 inhibitor attenuated Ang II-induced PDCD4 suppression (Fig. 6A). As a  
343 result, subsequent Ang II-induced activation of AP-1 and TGF- $\beta$ 1 mRNA expressions  
344 were significantly suppressed by miR-21 inhibitor. PDCD4 protein expression levels  
345 were restored by inhibiting miR-21 expressions, whereas c-Jun and TGF- $\beta$ 1 protein  
346 expression levels were significantly suppressed (Fig. 6B).

347 MiR-21 inhibitor significantly suppressed the phosphorylation of TAK1, a key  
348 molecular for cardiac hypertrophy, in NRCMs under Ang II stimulation (Fig. 6C).  
349 Atrial natriuretic peptide (ANP) and brain natriuretic peptide (BNP) mRNA expressions  
350 were significantly upregulated in NRCMs under Ang II stimulation. MiR-21 inhibitor

351 significantly suppressed the mRNA expression of ANP and BNP in NRCMs under Ang  
352 II stimulation (Fig. 6D).

353

354 **Fig 6. The impact of miR-21 suppression on cardiac remodeling under Ang II**  
355 **stimulation.**

356 **(A)** Effect of miR-21 suppression on PDCD4, AP-1, and TGF- $\beta$ 1 mRNA expressions in  
357 cardiomyocytes under Ang II stimulation for 24 h (n = 4–6 per group). **(B)** Effect of

358 miR-21 suppression on PDCD4, c-Jun, and TGF- $\beta$ 1 protein expressions in

359 cardiomyocytes under Ang II stimulation for 24 h (n = 4–6 per group). **(C)** Effect of

360 miR-21 suppression on TAK1 and pTAK1 expressions in cardiomyocytes under Ang II

361 stimulation for 24 h (n = 4–6 per group). **(D)** Effect of miR-21 suppression on fetal gene

362 expressions in cardiomyocytes under Ang II stimulation for 24 h (n = 4–6 per group).

363 Representative images from at least four independent results are shown. Data are

364 expressed as mean  $\pm$  SEM. \* $P < 0.05$ .

## 365 **Discussion**

366 In the present study, we revealed the functional role of miR-21 in hypertrophic cardiac  
367 remodeling. In patients with HHD, miR-21 expression levels were upregulated in the  
368 heart and blood samples. Furthermore, circulating miR-21 levels were positively  
369 correlated with serum markers of myocardial fibrosis. In cardiomyocytes, PDCD4  
370 played a pivotal role in regulating cardiac remodeling as a target gene of miR-21 under  
371 hypertrophic stimulation. Knockdown of miR-21 ameliorated AP-1 mediated TGF- $\beta$ 1  
372 signaling through regulating PDCD4 in cardiomyocytes. To the best of our knowledge,  
373 this study is the first report to evaluate the impact of miR-21 in patients with HHD, and  
374 that in cardiomyocytes in hypertrophic cardiac remodeling using *in vivo* and *in vitro*  
375 experiments. A schema that includes the suggested pathway from the present study is  
376 shown in Fig. 7.

377

378 **Fig 7. A schema that includes the proposed pathway of miR-21 in cardiac**  
379 **remodeling**

380

381 The pathogenetic mechanism of HHD is thought to be related to cardiac  
382 remodeling, including cardiac fibrosis and hypertrophy [28]. Hence, regression of



383 hypertrophic cardiac remodeling can improve the prognosis of patients with  
384 hypertension. The contribution of miRs in the cardiomyopathies such as ischemic heart  
385 disease, hypertrophic cardiomyopathy, and dilated cardiomyopathy has been shown [29-  
386 31]. However, the impact of miR-21 as well as other miRs on the pathogenesis of HHD,  
387 which is one of the most important hypertension-induced organ damages is still unclear.  
388 In the present study, we showed that miR-21 expression levels were significantly  
389 increased in both serum and heart samples of patients with HHD compared with normal  
390 subjects. Moreover, there were significant positive correlations between circulating  
391 miR-21 levels and serum markers of myocardial fibrosis. These findings support the  
392 association between miR-21 and cardiac remodeling in patients with HHD.

393       It is well known that hypertension-derived mechanical stress induces Ang II  
394 synthesis, and subsequent activation of nuclear AP-1 leads to the upregulation of TGF-  
395  $\beta$ 1 [32]. TGF- $\beta$ 1 induces fibroblast-to-myofibroblast differentiation and extracellular  
396 matrix (ECM) production, which leads to cardiac fibrosis [33]. It was reported that  
397 TGF- $\beta$ 1 was increased with advancing of fibrosis in the hearts of patients who  
398 underwent cardiac surgery [34]. While mice with systemic overexpression of TGF- $\beta$ 1  
399 showed cardiac fibrosis and hypertrophy, mice with systemic knock-out of TGF- $\beta$ 1  
400 ameliorated Ang II-induced cardiac hypertrophy [35, 36]. TGF- $\beta$ 1 is a key mediator of

401 the pathogenesis of cardiac remodeling under hypertrophic stimulation. Interestingly,  
402 activation of TGF- $\beta$ 1 signaling increases miR-21 expressions [13]. In contrast, several  
403 reports revealed that miR-21 can activate TGF- $\beta$ 1 signaling [11, 12]. This  
404 interrelationship forms interesting positive feedback loop. Our results *in vivo* study  
405 showed that miR-21 and TGF- $\beta$ 1 expression levels were significantly increased in Ang  
406 II infused mice and TAC mice, suggesting that an interrelationship between miR-21 and  
407 TGF- $\beta$ 1 may play an important role in hypertrophic cardiac remodeling.

408 Elevated miR-21 expression levels were reported to be associated with organ  
409 fibrosis, such as lung, kidney, liver, and heart via promoting fibroblast activation [12,  
410 16, 37, 38]. Several reports have shown the fibrogenic function of miR-21 in fibroblasts  
411 through modulation of its target genes, such as PDCD4, Smad7, PTEN, and Spry1 [12,  
412 15, 26, 27]. Thus, although the functional role of miR-21 in fibroblast is well known,  
413 there were few studies assessing the functional role of miR-21 in cardiomyocyte. In the  
414 present study, we found that Ang II significantly upregulated PDCD4 mRNA  
415 expression in cardiomyocytes, although there were no significant differences in the  
416 mRNA expression levels of Smad7, PTEN, and Spry1. These results suggest that  
417 PDCD4 plays an important role in regulating cardiac remodeling as a target gene of  
418 miR-21 under hypertrophic stimulation in cardiomyocyte.

419 PDCD4 is a well-known tumor suppressor and is involved in apoptosis. It was  
420 reported to be a powerful inhibitor of AP-1 [39]. On the other hand, activation of AP-1  
421 upregulates miR-21 expressions [40]. In the present study, we showed that PDCD4 was  
422 significantly decreased and AP-1 was increased in Ang II infused mice and TAC mice.  
423 In addition, AP-1 mediated TGF- $\beta$ 1 expression was significantly upregulated under Ang  
424 II stimulation *in vitro*. Thus, there arises a possibility that miR-21 might enhance its  
425 own transcription through miR-21/PDCD4/AP-1 pathway and exacerbate the fibrogenic  
426 process in hypertrophic cardiac remodeling.

427 Cardiomyocytes and fibroblasts cooperatively regulate cardiac cell signaling via  
428 paracrine mediators, which is involved in cardiac remodeling [41]. It has been reported  
429 that TGF- $\beta$ 1 was induced in response to hypertrophic stimuli not only in fibroblasts but  
430 also in cardiomyocytes, and acting in a paracrine and/or autocrine manner [42, 43].  
431 However, although the effects of miR-21 inhibition on cardiac remodeling were  
432 demonstrated in fibroblast, its effects in cardiomyocyte were poorly understood. In the  
433 present study, knockdown of miR-21 expression rescued Ang II-induced PDCD4  
434 suppression. Furthermore, knockdown of miR-21 significantly suppressed Ang II-  
435 induced AP-1 and TGF- $\beta$ 1 signaling in cardiomyocytes. These results suggest that  
436 inhibition of miR-21 prevents hypertrophic stimulation-induced cardiac fibrosis by

437 suppressing miR-21/PDCD4/AP-1 feedback loop.

438 In addition to fibrogenic function of TGF- $\beta$ 1, Koitabashi et al. showed that  
439 suppression of myocyte-derived TGF- $\beta$ 1 ameliorated cardiac hypertrophy by inhibiting  
440 non-canonical pathways, in particular TAK1 [44]. Consistently, we showed that Ang II  
441 stimulation induced TAK1 activation in cardiomyocytes. Furthermore, we showed that  
442 inhibition of miR-21 expression suppressed TAK1 activity and subsequent fetal gene  
443 expressions in cardiomyocytes. Remarkably, Thum et al. demonstrated that silencing of  
444 miR-21 *in vivo* attenuated cardiac fibrosis and hypertrophy under pressure overload  
445 stimulation through deactivation of cardiac fibroblast [15]. Taking our results into  
446 consideration, this beneficial effect of miR-21 inhibitor in suppressing hypertrophic  
447 cardiac remodeling might be attributed to not only cardiac fibroblast but also  
448 cardiomyocyte.

449 We need to point out several limitations of our study. First, 3 patients with  
450 hypertension were included in control group, although they had normal cardiac function  
451 and had no left ventricular hypertrophy. Second, because there were 6 patients with  
452 diabetes mellitus in HHD group, we could not completely rule out the possibility of the  
453 influence of diabetes mellitus on cardiac remodeling. Third, EMB study size was  
454 relatively small for investigating the impact of miR-21 on cardiac remodeling in

455 patients with HHD. Finally, we have not evaluated the effect of miR-21 inhibitor *in*  
456 *vivo*. Several studies demonstrated that inhibition of miR-21 suppressed cardiac  
457 remodeling by regulating cardiac fibroblast [15, 16, 26], although we confirmed the  
458 protective effect of miR-21 inhibitor in cardiomyocyte under hypertrophic stimulation  
459 *in vitro*.

## 460 **Conclusions**

461 MiR-21 was associated with fibrogenesis in heart under hypertrophic stimulation.

462 Inhibition of miR-21 expressions prevent hypertrophic cardiac remodeling by regulating

463 PDCD4 and AP-1, TGF- $\beta$ 1 signaling pathway.

464 **Acknowledgement**

465 We thank Ms. Emiko Nishidate and Ms. Hiroko Sasaki for their excellent technical  
466 assistance and comments.

## 467 **References**

- 468 1. Worldwide trends in blood pressure from 1975 to 2015: a pooled analysis of 1479  
469 population-based measurement studies with 19.1 million participants. *Lancet* (London,  
470 England). 2017;389(10064):37-55. Epub 2016/11/20. doi: 10.1016/s0140-6736(16)31919-5.  
471 PubMed PMID: 27863813; PubMed Central PMCID: PMCPMC5220163.
- 472 2. Mills KT, Bundy JD, Kelly TN, Reed JE, Kearney PM, Reynolds K, et al. Global Disparities  
473 of Hypertension Prevalence and Control: A Systematic Analysis of Population-Based Studies  
474 From 90 Countries. *Circulation*. 2016;134(6):441-50. Epub 2016/08/10. doi:  
475 10.1161/circulationaha.115.018912. PubMed PMID: 27502908; PubMed Central PMCID:  
476 PMCPMC4979614.
- 477 3. Williams B, Mancia G, Spiering W, Agabiti Rosei E, Azizi M, Burnier M, et al. 2018  
478 ESC/ESH Guidelines for the management of arterial hypertension. *Eur Heart J*.  
479 2018;39(33):3021-104. Epub 2018/08/31. doi: 10.1093/eurheartj/ehy339. PubMed PMID:  
480 30165516.
- 481 4. Drazner MH. The progression of hypertensive heart disease. *Circulation*. 2011;123(3):327-  
482 34. Epub 2011/01/26. doi: 10.1161/circulationaha.108.845792. PubMed PMID: 21263005.
- 483 5. Haider AW, Larson MG, Franklin SS, Levy D. Systolic blood pressure, diastolic blood  
484 pressure, and pulse pressure as predictors of risk for congestive heart failure in the Framingham  
485 Heart Study. *Annals of internal medicine*. 2003;138(1):10-6. Epub 2003/01/07. PubMed PMID:  
486 12513039.
- 487 6. Runte KE, Bell SP, Selby DE, Haussler TN, Ashikaga T, LeWinter MM, et al. Relaxation  
488 and the Role of Calcium in Isolated Contracting Myocardium From Patients With Hypertensive  
489 Heart Disease and Heart Failure With Preserved Ejection Fraction. *Circulation Heart failure*.  
490 2017;10(8). Epub 2017/08/09. doi: 10.1161/circheartfailure.117.004311. PubMed PMID:  
491 28784688; PubMed Central PMCID: PMCPMC5567852.
- 492 7. Owan TE, Hodge DO, Herges RM, Jacobsen SJ, Roger VL, Redfield MM. Trends in  
493 prevalence and outcome of heart failure with preserved ejection fraction. *The New England*  
494 *journal of medicine*. 2006;355(3):251-9. Epub 2006/07/21. doi: 10.1056/NEJMoa052256.  
495 PubMed PMID: 16855265.
- 496 8. Jiang X, Tsitsiou E, Herrick SE, Lindsay MA. MicroRNAs and the regulation of fibrosis. *The*  
497 *FEBS journal*. 2010;277(9):2015-21. Epub 2010/04/24. doi: 10.1111/j.1742-4658.2010.07632.x.  
498 PubMed PMID: 20412055; PubMed Central PMCID: PMCPMC2963651.
- 499 9. Huang Y, He Y, Li J. MicroRNA-21: a central regulator of fibrotic diseases via various  
500 targets. *Curr Pharm Des*. 2015;21(17):2236-42. Epub 2014/12/30. doi:  
501 10.2174/1381612820666141226095701. PubMed PMID: 25541205.



- 502 10. Dobaczewski M, Chen W, Frangogiannis NG. Transforming growth factor (TGF)-beta  
503 signaling in cardiac remodeling. *Journal of molecular and cellular cardiology*. 2011;51(4):600-6.  
504 Epub 2010/11/10. doi: 10.1016/j.yjmcc.2010.10.033. PubMed PMID: 21059352; PubMed  
505 Central PMCID: PMCPMC3072437.
- 506 11. Liu RH, Ning B, Ma XE, Gong WM, Jia TH. Regulatory roles of microRNA-21 in fibrosis  
507 through interaction with diverse pathways (Review). *Molecular medicine reports*.  
508 2016;13(3):2359-66. Epub 2016/02/06. doi: 10.3892/mmr.2016.4834. PubMed PMID:  
509 26846276.
- 510 12. Sun Q, Miao J, Luo J, Yuan Q, Cao H, Su W, et al. The feedback loop between miR-21,  
511 PDCD4 and AP-1 functions as a driving force for renal fibrogenesis. *J Cell Sci*. 2018;131(6).  
512 Epub 2018/01/24. doi: 10.1242/jcs.202317. PubMed PMID: 29361523.
- 513 13. Davis BN, Hilyard AC, Lagna G, Hata A. SMAD proteins control DROSHA-mediated  
514 microRNA maturation. *Nature*. 2008;454(7200):56-61. Epub 2008/06/13. doi:  
515 10.1038/nature07086. PubMed PMID: 18548003; PubMed Central PMCID:  
516 PMCPMC2653422.
- 517 14. Fang L, Ellims AH, Moore XL, White DA, Taylor AJ, Chin-Dusting J, et al. Circulating  
518 microRNAs as biomarkers for diffuse myocardial fibrosis in patients with hypertrophic  
519 cardiomyopathy. *Journal of translational medicine*. 2015;13:314. Epub 2015/09/26. doi:  
520 10.1186/s12967-015-0672-0. PubMed PMID: 26404540; PubMed Central PMCID:  
521 PMCPMC4581079.
- 522 15. Thum T, Gross C, Fiedler J, Fischer T, Kissler S, Bussen M, et al. MicroRNA-21 contributes  
523 to myocardial disease by stimulating MAP kinase signalling in fibroblasts. *Nature*.  
524 2008;456(7224):980-4. Epub 2008/12/02. doi: 10.1038/nature07511. PubMed PMID:  
525 19043405.
- 526 16. Lorenzen JM, Schauerte C, Hubner A, Kolling M, Martino F, Scherf K, et al. Osteopontin is  
527 indispensable for AP1-mediated angiotensin II-related miR-21 transcription during cardiac  
528 fibrosis. *Eur Heart J*. 2015;36(32):2184-96. Epub 2015/04/23. doi: 10.1093/eurheartj/ehv109.  
529 PubMed PMID: 25898844; PubMed Central PMCID: PMCPMC4543785.
- 530 17. Kitahara T, Takeishi Y, Arimoto T, Niizeki T, Koyama Y, Sasaki T, et al. Serum carboxy-  
531 terminal telopeptide of type I collagen (ICTP) predicts cardiac events in chronic heart failure  
532 patients with preserved left ventricular systolic function. *Circulation journal : official journal of*  
533 *the Japanese Circulation Society*. 2007;71(6):929-35. Epub 2007/05/29. PubMed PMID:  
534 17526992.
- 535 18. Takahashi T, Shishido T, Kinoshita D, Watanabe K, Toshima T, Sugai T, et al. Cardiac  
536 Nuclear High-Mobility Group Box 1 Ameliorates Pathological Cardiac Hypertrophy by  
537 Inhibiting DNA Damage Response. *JACC Basic to translational science*. 2019;4(2):234-47. Epub

- 538 2019/05/08. doi: 10.1016/j.jacbts.2018.11.011. PubMed PMID: 31061925; PubMed Central  
539 PMCID: PMC6488753.
- 540 19. Carnevale D, Mascio G, D'Andrea I, Fardella V, Bell RD, Branchi I, et al. Hypertension  
541 induces brain beta-amyloid accumulation, cognitive impairment, and memory deterioration  
542 through activation of receptor for advanced glycation end products in brain vasculature.  
543 Hypertension. 2012;60(1):188-97. Epub 2012/05/23. doi:  
544 10.1161/hypertensionaha.112.195511. PubMed PMID: 22615109; PubMed Central PMCID:  
545 PMC3530195.
- 546 20. Netsu S, Shishido T, Kitahara T, Honda Y, Funayama A, Narumi T, et al. Midkine  
547 exacerbates pressure overload-induced cardiac remodeling. Biochem Biophys Res Commun.  
548 2014;443(1):205-10. Epub 2013/12/03. doi: 10.1016/j.bbrc.2013.11.083. PubMed PMID:  
549 24291499.
- 550 21. Otaki Y, Takahashi H, Watanabe T, Funayama A, Netsu S, Honda Y, et al. HECT-Type  
551 Ubiquitin E3 Ligase ITCH Interacts With Thioredoxin-Interacting Protein and Ameliorates  
552 Reactive Oxygen Species-Induced Cardiotoxicity. J Am Heart Assoc. 2016;5(1). doi:  
553 10.1161/JAHA.115.002485. PubMed PMID: 26796253; PubMed Central PMCID:  
554 PMC4859366.
- 555 22. Song J, Zhu Y, Li J, Liu J, Gao Y, Ha T, et al. Pellino1-mediated TGF-beta1 synthesis  
556 contributes to mechanical stress induced cardiac fibroblast activation. Journal of molecular and  
557 cellular cardiology. 2015;79:145-56. Epub 2014/12/03. doi: 10.1016/j.yjmcc.2014.11.006.  
558 PubMed PMID: 25446187.
- 559 23. Takahashi H, Takeishi Y, Seidler T, Arimoto T, Akiyama H, Hozumi Y, et al. Adenovirus-  
560 mediated overexpression of diacylglycerol kinase-zeta inhibits endothelin-1-induced  
561 cardiomyocyte hypertrophy. Circulation. 2005;111(12):1510-6. Epub 2005/03/23. doi:  
562 10.1161/01.Cir.0000159339.00703.22. PubMed PMID: 15781737.
- 563 24. van Rooij E, Olson EN. Searching for miR-acles in cardiac fibrosis. Circ Res.  
564 2009;104(2):138-40. Epub 2009/01/31. doi: 10.1161/circresaha.108.192492. PubMed PMID:  
565 19179664; PubMed Central PMCID: PMC2747251.
- 566 25. Mansour IN, Bress AP, Groo V, Ismail S, Wu G, Patel SR, et al. Circulating Procollagen  
567 Type III N-Terminal Peptide and Mortality Risk in African Americans With Heart Failure.  
568 Journal of cardiac failure. 2016;22(9):692-9. Epub 2016/01/02. doi:  
569 10.1016/j.cardfail.2015.12.016. PubMed PMID: 26721774; PubMed Central PMCID:  
570 PMC4917490.
- 571 26. Yuan J, Chen H, Ge D, Xu Y, Xu H, Yang Y, et al. Mir-21 Promotes Cardiac Fibrosis After  
572 Myocardial Infarction Via Targeting Smad7. Cellular physiology and biochemistry : international  
573 journal of experimental cellular physiology, biochemistry, and pharmacology. 2017;42(6):2207-

- 574 19. Epub 2017/08/18. doi: 10.1159/000479995. PubMed PMID: 28817807.
- 575 27. Roy S, Khanna S, Hussain SR, Biswas S, Azad A, Rink C, et al. MicroRNA expression in  
576 response to murine myocardial infarction: miR-21 regulates fibroblast metalloprotease-2 via  
577 phosphatase and tensin homologue. *Cardiovasc Res.* 2009;82(1):21-9. Epub 2009/01/17. doi:  
578 10.1093/cvr/cvp015. PubMed PMID: 19147652; PubMed Central PMCID: PMCPMC2652741.
- 579 28. Weber KT, Sun Y, Gerling IC, Guntaka RV. Regression of Established Cardiac Fibrosis in  
580 Hypertensive Heart Disease. *American journal of hypertension.* 2017;30(11):1049-52. Epub  
581 2017/04/06. doi: 10.1093/ajh/hpx054. PubMed PMID: 28379281.
- 582 29. Li X, Yang Y, Wang L, Qiao S, Lu X, Wu Y, et al. Plasma miR-122 and miR-3149 Potentially  
583 Novel Biomarkers for Acute Coronary Syndrome. *PLoS One.* 2015;10(5):e0125430. Epub  
584 2015/05/02. doi: 10.1371/journal.pone.0125430. PubMed PMID: 25933289; PubMed Central  
585 PMCID: PMCPMC4416808.
- 586 30. Kuster DW, Mulders J, Ten Cate FJ, Michels M, Dos Remedios CG, da Costa Martins PA,  
587 et al. MicroRNA transcriptome profiling in cardiac tissue of hypertrophic cardiomyopathy  
588 patients with MYBPC3 mutations. *Journal of molecular and cellular cardiology.* 2013;65:59-66.  
589 Epub 2013/10/03. doi: 10.1016/j.yjmcc.2013.09.012. PubMed PMID: 24083979.
- 590 31. Zhou Q, Schotterl S, Backes D, Brunner E, Hahn JK, Ionesi E, et al. Inhibition of miR-208b  
591 improves cardiac function in titin-based dilated cardiomyopathy. *Int J Cardiol.* 2017;230:634-41.  
592 Epub 2017/01/10. doi: 10.1016/j.ijcard.2016.12.171. PubMed PMID: 28065693.
- 593 32. Rosenkranz S. TGF-beta1 and angiotensin networking in cardiac remodeling. *Cardiovasc*  
594 *Res.* 2004;63(3):423-32. Epub 2004/07/28. doi: 10.1016/j.cardiores.2004.04.030. PubMed  
595 PMID: 15276467.
- 596 33. Weber KT, Sun Y, Bhattacharya SK, Ahokas RA, Gerling IC. Myofibroblast-mediated  
597 mechanisms of pathological remodelling of the heart. *Nature reviews Cardiology.* 2013;10(1):15-  
598 26. Epub 2012/12/05. doi: 10.1038/nrcardio.2012.158. PubMed PMID: 23207731.
- 599 34. Hein S, Arnon E, Kostin S, Schonburg M, Elsasser A, Polyakova V, et al. Progression from  
600 compensated hypertrophy to failure in the pressure-overloaded human heart: structural  
601 deterioration and compensatory mechanisms. *Circulation.* 2003;107(7):984-91. Epub  
602 2003/02/26. PubMed PMID: 12600911.
- 603 35. Rosenkranz S, Flesch M, Amann K, Haeuseler C, Kilter H, Seeland U, et al. Alterations of  
604 beta-adrenergic signaling and cardiac hypertrophy in transgenic mice overexpressing TGF-  
605 beta(1). *American journal of physiology Heart and circulatory physiology.* 2002;283(3):H1253-  
606 62. Epub 2002/08/16. doi: 10.1152/ajpheart.00578.2001. PubMed PMID: 12181157.
- 607 36. Schultz Jel J, Witt SA, Glascock BJ, Nieman ML, Reiser PJ, Nix SL, et al. TGF-beta1  
608 mediates the hypertrophic cardiomyocyte growth induced by angiotensin II. *J Clin Invest.*  
609 2002;109(6):787-96. Epub 2002/03/20. doi: 10.1172/jci14190. PubMed PMID: 11901187;

- 610 PubMed Central PMCID: PMCPMC150912.
- 611 37. Sun NN, Yu CH, Pan MX, Zhang Y, Zheng BJ, Yang QJ, et al. Mir-21 Mediates the  
612 Inhibitory Effect of Ang (1-7) on AngII-induced NLRP3 Inflammasome Activation by Targeting  
613 Spry1 in lung fibroblasts. *Scientific reports*. 2017;7(1):14369. Epub 2017/11/01. doi:  
614 10.1038/s41598-017-13305-3. PubMed PMID: 29084974; PubMed Central PMCID:  
615 PMCPMC5662719.
- 616 38. Zhang Z, Zha Y, Hu W, Huang Z, Gao Z, Zang Y, et al. The autoregulatory feedback loop of  
617 microRNA-21/programmed cell death protein 4/activation protein-1 (MiR-21/PDCD4/AP-1)  
618 as a driving force for hepatic fibrosis development. *J Biol Chem*. 2013;288(52):37082-93. Epub  
619 2013/11/08. doi: 10.1074/jbc.M113.517953. PubMed PMID: 24196965; PubMed Central  
620 PMCID: PMCPMC3873564.
- 621 39. Yang HS, Knies JL, Stark C, Colburn NH. Pcd4 suppresses tumor phenotype in JB6 cells  
622 by inhibiting AP-1 transactivation. *Oncogene*. 2003;22(24):3712-20. Epub 2003/06/13. doi:  
623 10.1038/sj.onc.1206433. PubMed PMID: 12802278.
- 624 40. Talotta F, Cimmino A, Matarazzo MR, Casalino L, De Vita G, D'Esposito M, et al. An  
625 autoregulatory loop mediated by miR-21 and PDCD4 controls the AP-1 activity in RAS  
626 transformation. *Oncogene*. 2009;28(1):73-84. Epub 2008/10/14. doi: 10.1038/onc.2008.370.  
627 PubMed PMID: 18850008.
- 628 41. Pellman J, Zhang J, Sheikh F. Myocyte-fibroblast communication in cardiac fibrosis and  
629 arrhythmias: Mechanisms and model systems. *Journal of molecular and cellular cardiology*.  
630 2016;94:22-31. Epub 2016/03/22. doi: 10.1016/j.yjmcc.2016.03.005. PubMed PMID:  
631 26996756; PubMed Central PMCID: PMCPMC4861678.
- 632 42. Takahashi N, Calderone A, Izzo NJ, Jr., Maki TM, Marsh JD, Colucci WS. Hypertrophic  
633 stimuli induce transforming growth factor-beta 1 expression in rat ventricular myocytes. *J Clin*  
634 *Invest*. 1994;94(4):1470-6. Epub 1994/10/01. doi: 10.1172/jci117485. PubMed PMID:  
635 7929822; PubMed Central PMCID: PMCPMC295284.
- 636 43. Gray MO, Long CS, Kalinyak JE, Li HT, Karliner JS. Angiotensin II stimulates cardiac  
637 myocyte hypertrophy via paracrine release of TGF-beta 1 and endothelin-1 from fibroblasts.  
638 *Cardiovasc Res*. 1998;40(2):352-63. Epub 1999/01/20. doi: 10.1016/s0008-6363(98)00121-7.  
639 PubMed PMID: 9893729.
- 640 44. Koitabashi N, Danner T, Zaiman AL, Pinto YM, Rowell J, Mankowski J, et al. Pivotal role of  
641 cardiomyocyte TGF-beta signaling in the murine pathological response to sustained pressure  
642 overload. *J Clin Invest*. 2011;121(6):2301-12. Epub 2011/05/04. doi: 10.1172/jci44824.  
643 PubMed PMID: 21537080; PubMed Central PMCID: PMCPMC3104748.
- 644
- 645

## 646 **Supporting information**

### 647 **S1 Fig. Smad7, PTEN, and Spry1 mRNA levels in Ang II infused and TAC mice.**

648 **(A)** Smad7, PTEN, and Spry1 mRNA levels in Ang II infused mice compared with  
649 those of saline infused mice (n = 6 per group). **(B)** Smad7, PTEN, and Spry1 mRNA  
650 levels in TAC mice compared with those of sham mice (n = 6 per group). Data are  
651 expressed as mean  $\pm$  SEM. \* $P < 0.05$ .

652

### 653 **S2 Fig. The differences in the expression levels of miR-21 targets between**

#### 654 **cardiomyocytes and cardiofibroblasts.**

655 **(A)** The mRNA expressions of Smad7, PTEN, and Spry1 after treatment with vehicle or  
656 Ang II for 24 h in NRCMs (n = 4–6 per group). **(B)** The mRNA expressions of PDCD4,  
657 Smad7, PTEN, and Spry1 after treatment with vehicle or Ang II for 24 h in  
658 cardiofibroblasts (n = 4–6 per group). Data are expressed as mean  $\pm$  SEM. \* $P < 0.05$ .

Fig. 1

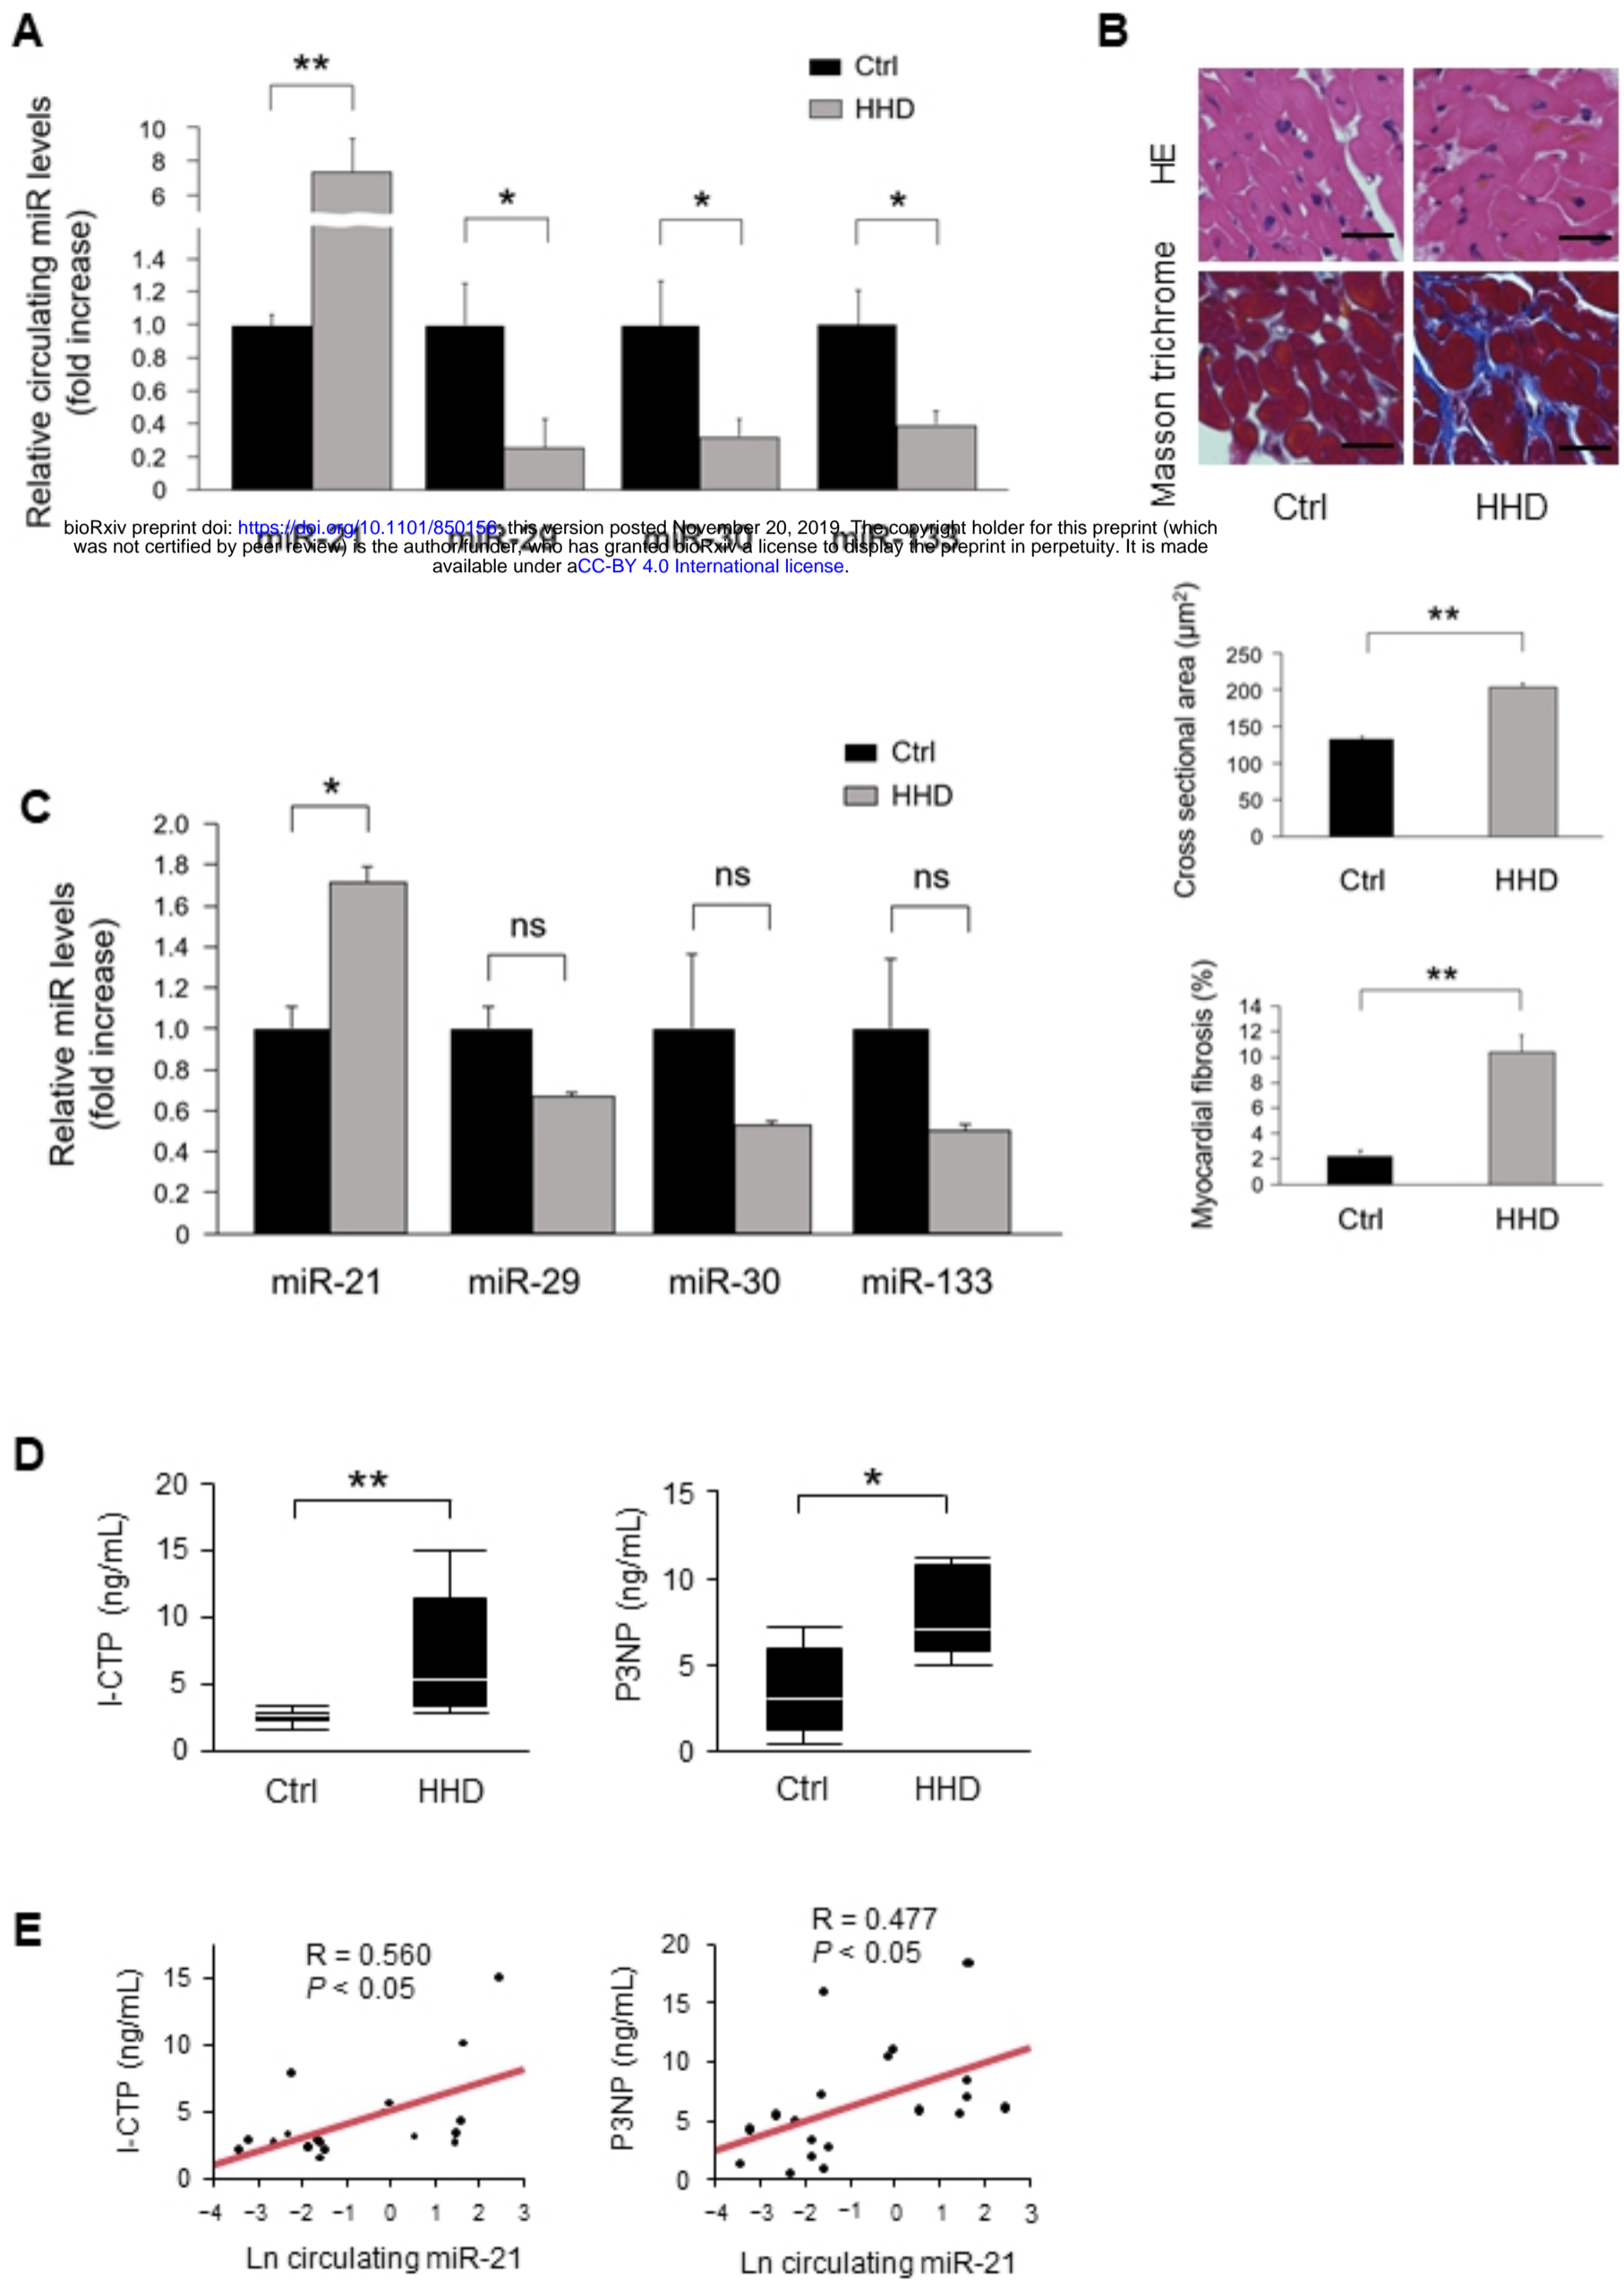

Fig. 1

Fig. 2

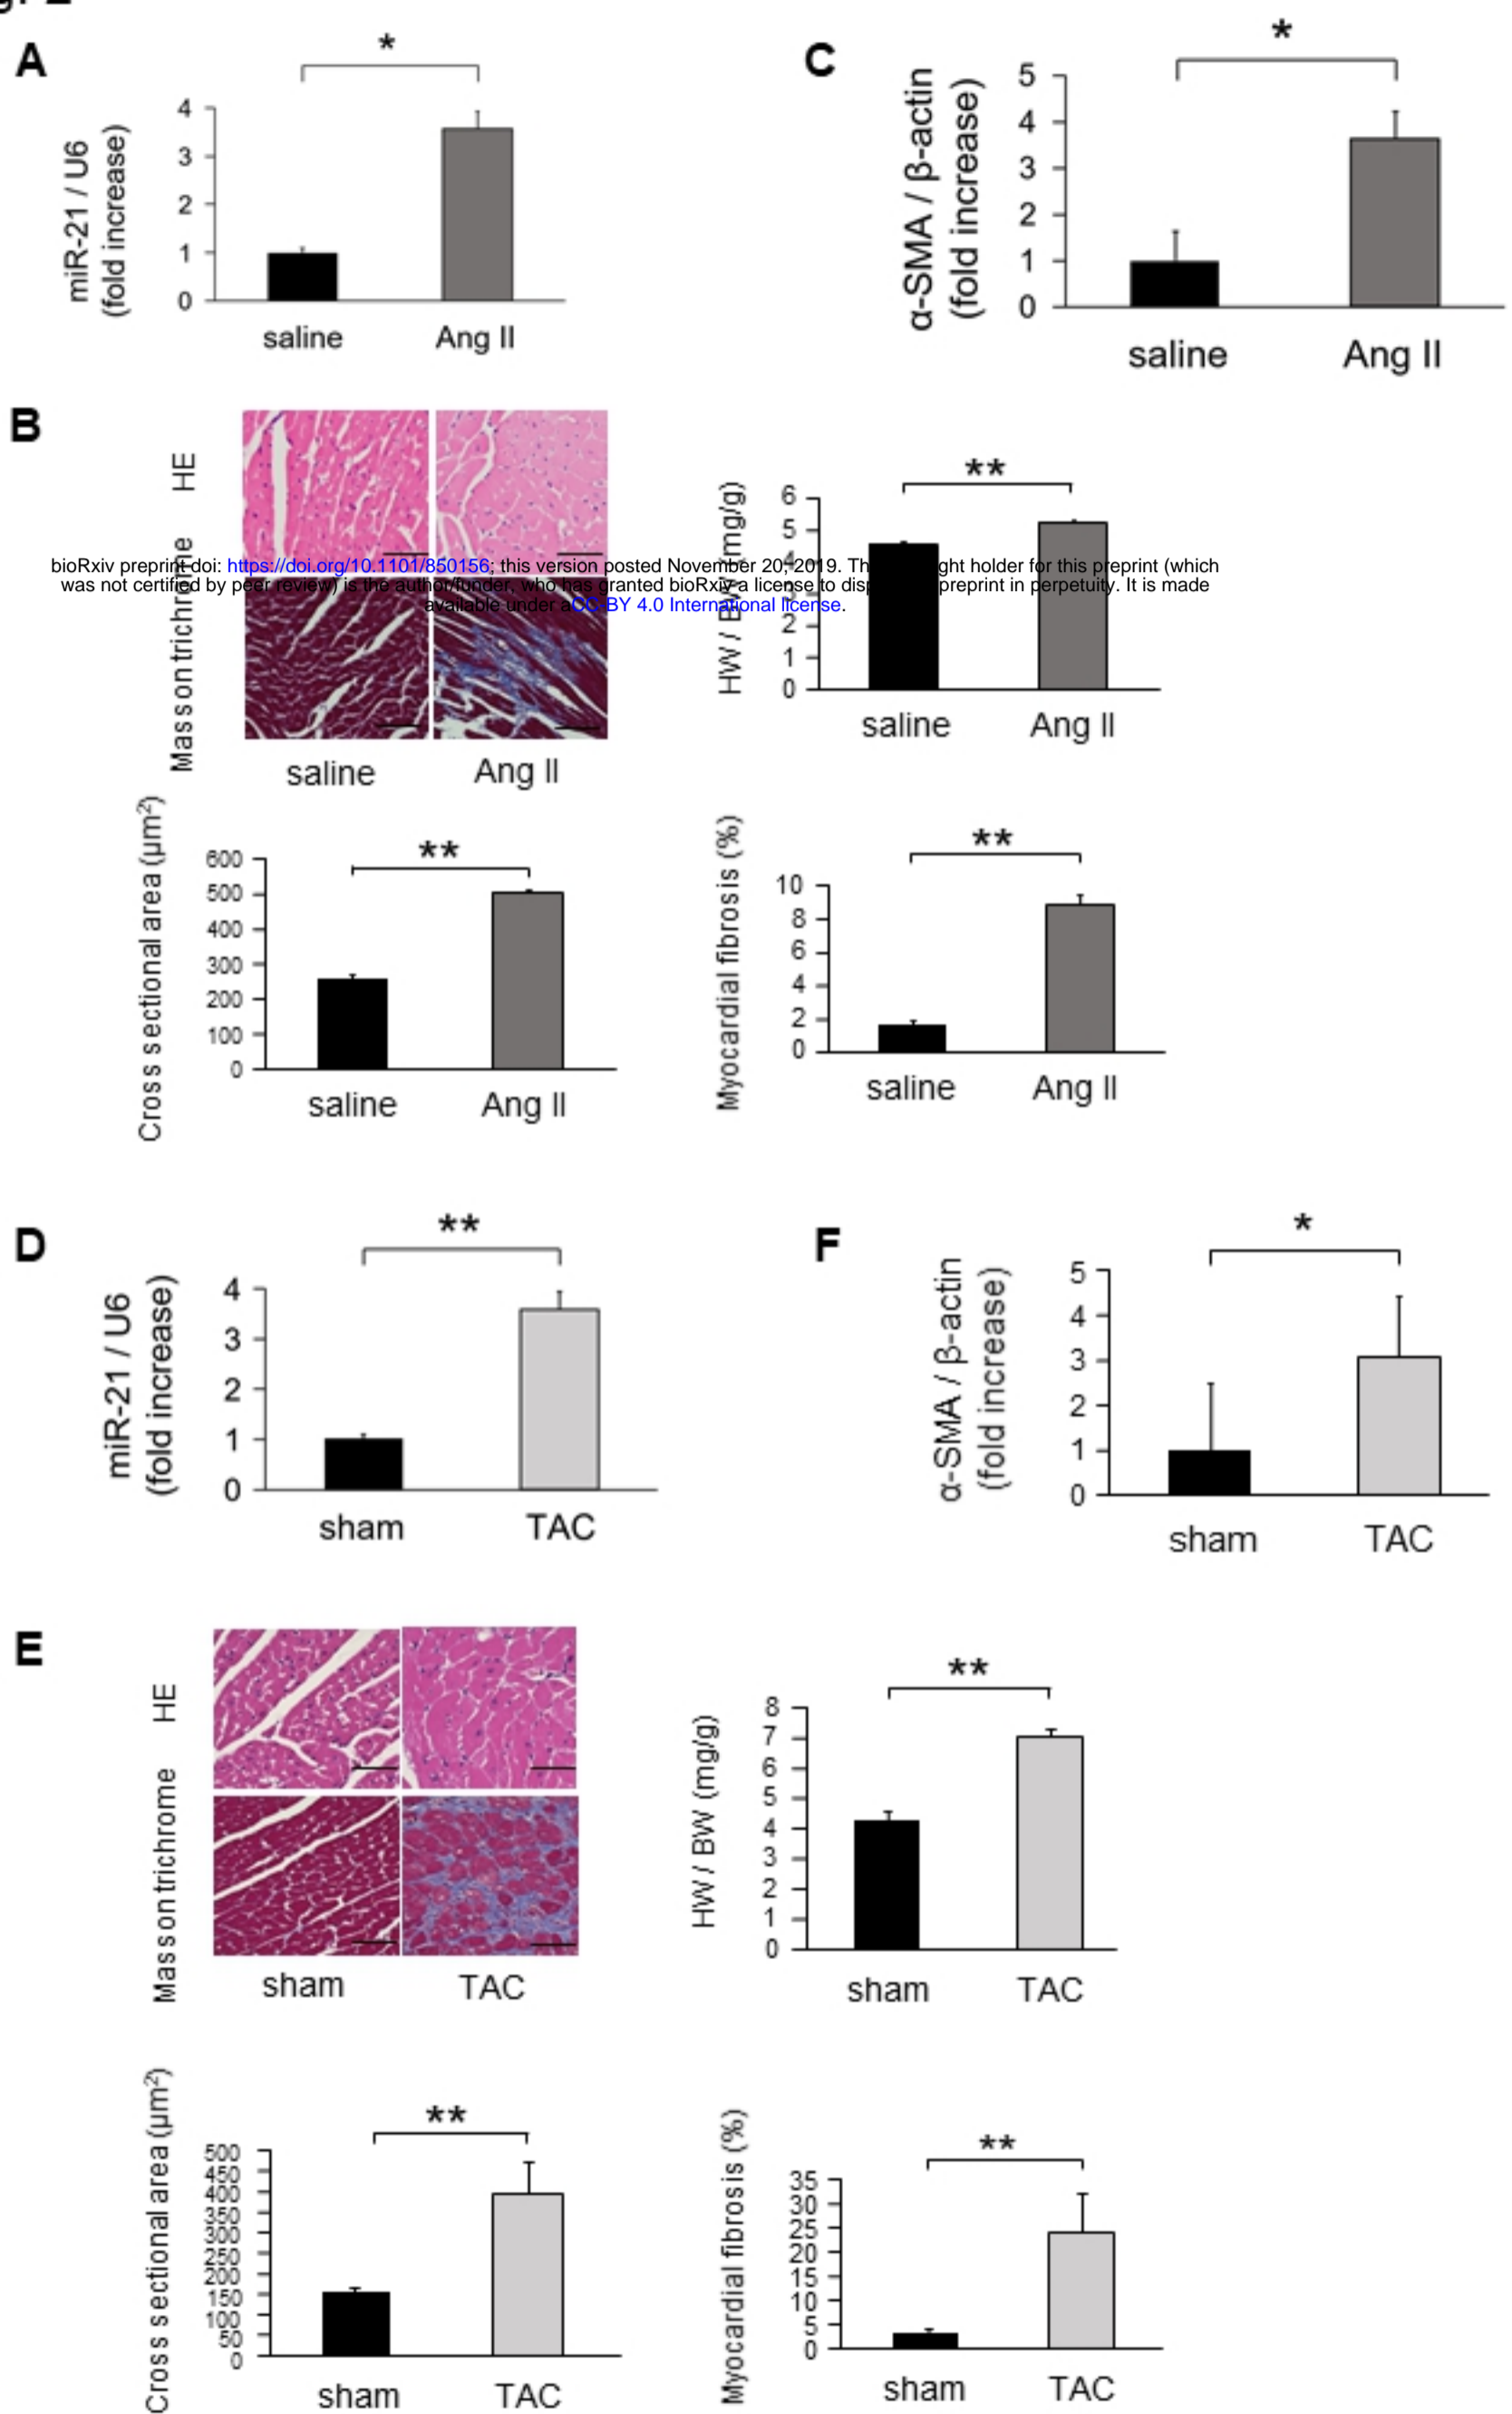

Fig. 2

Fig. 3

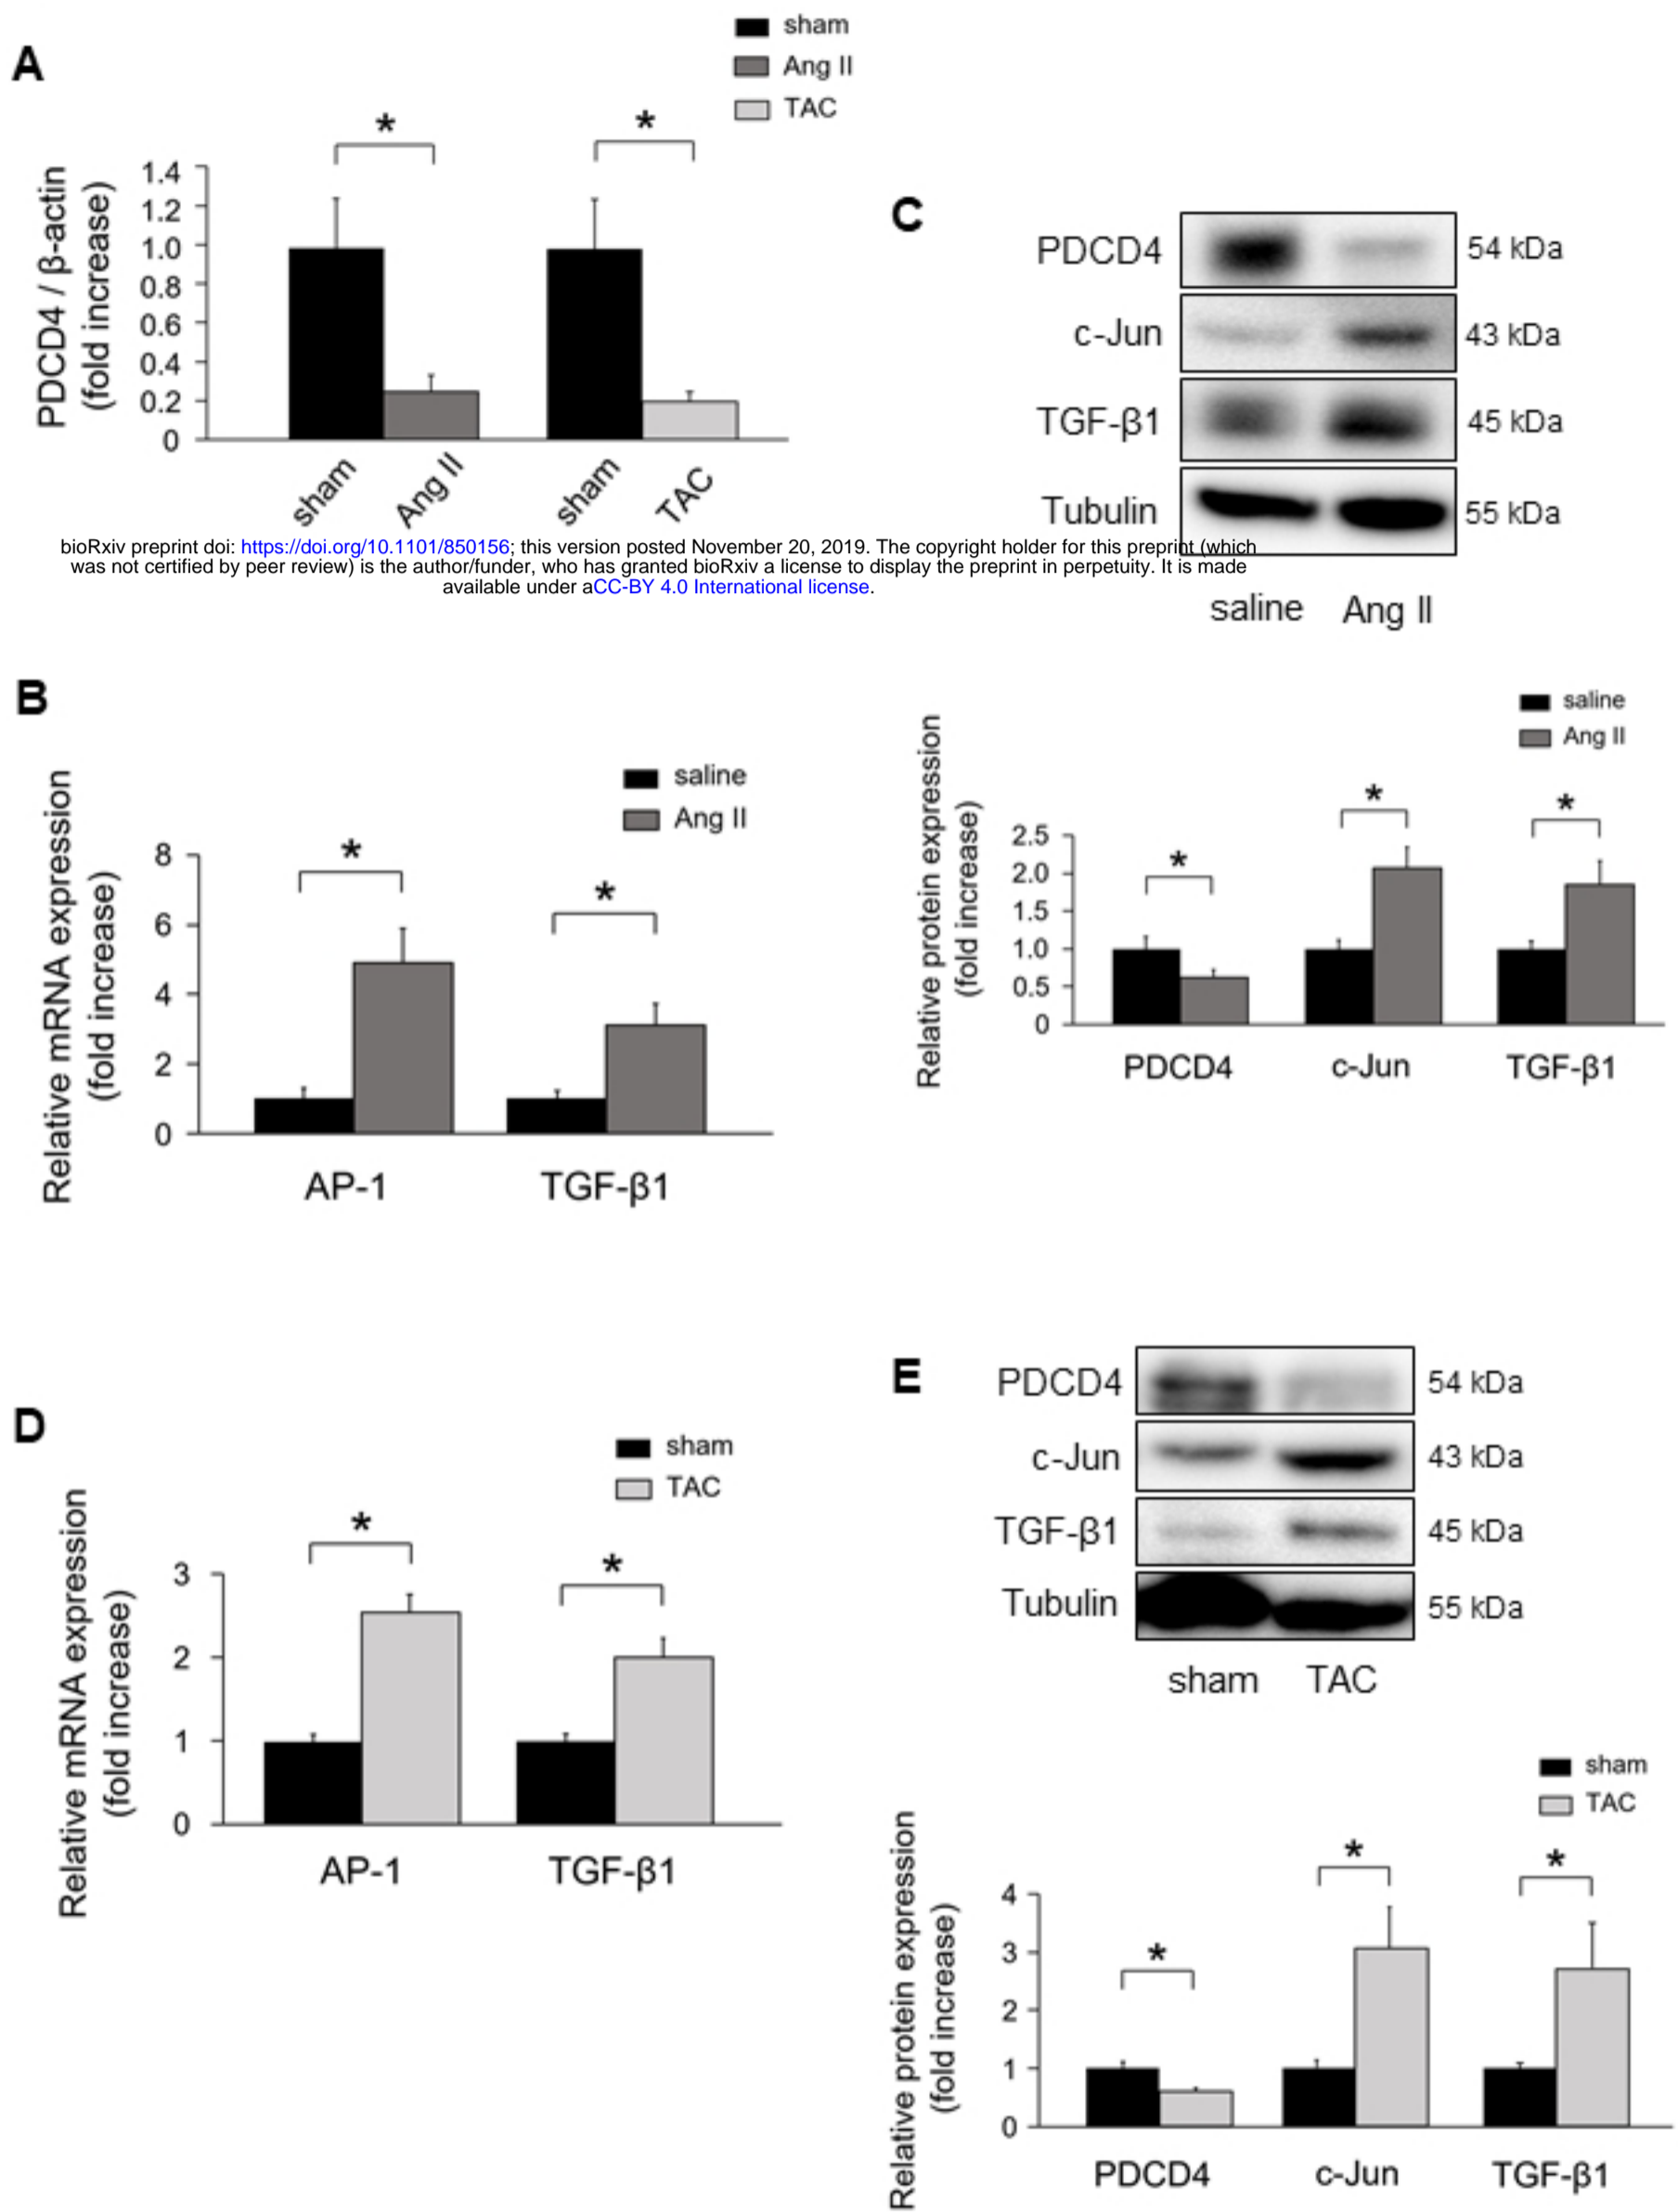

Fig. 3



Fig. 4

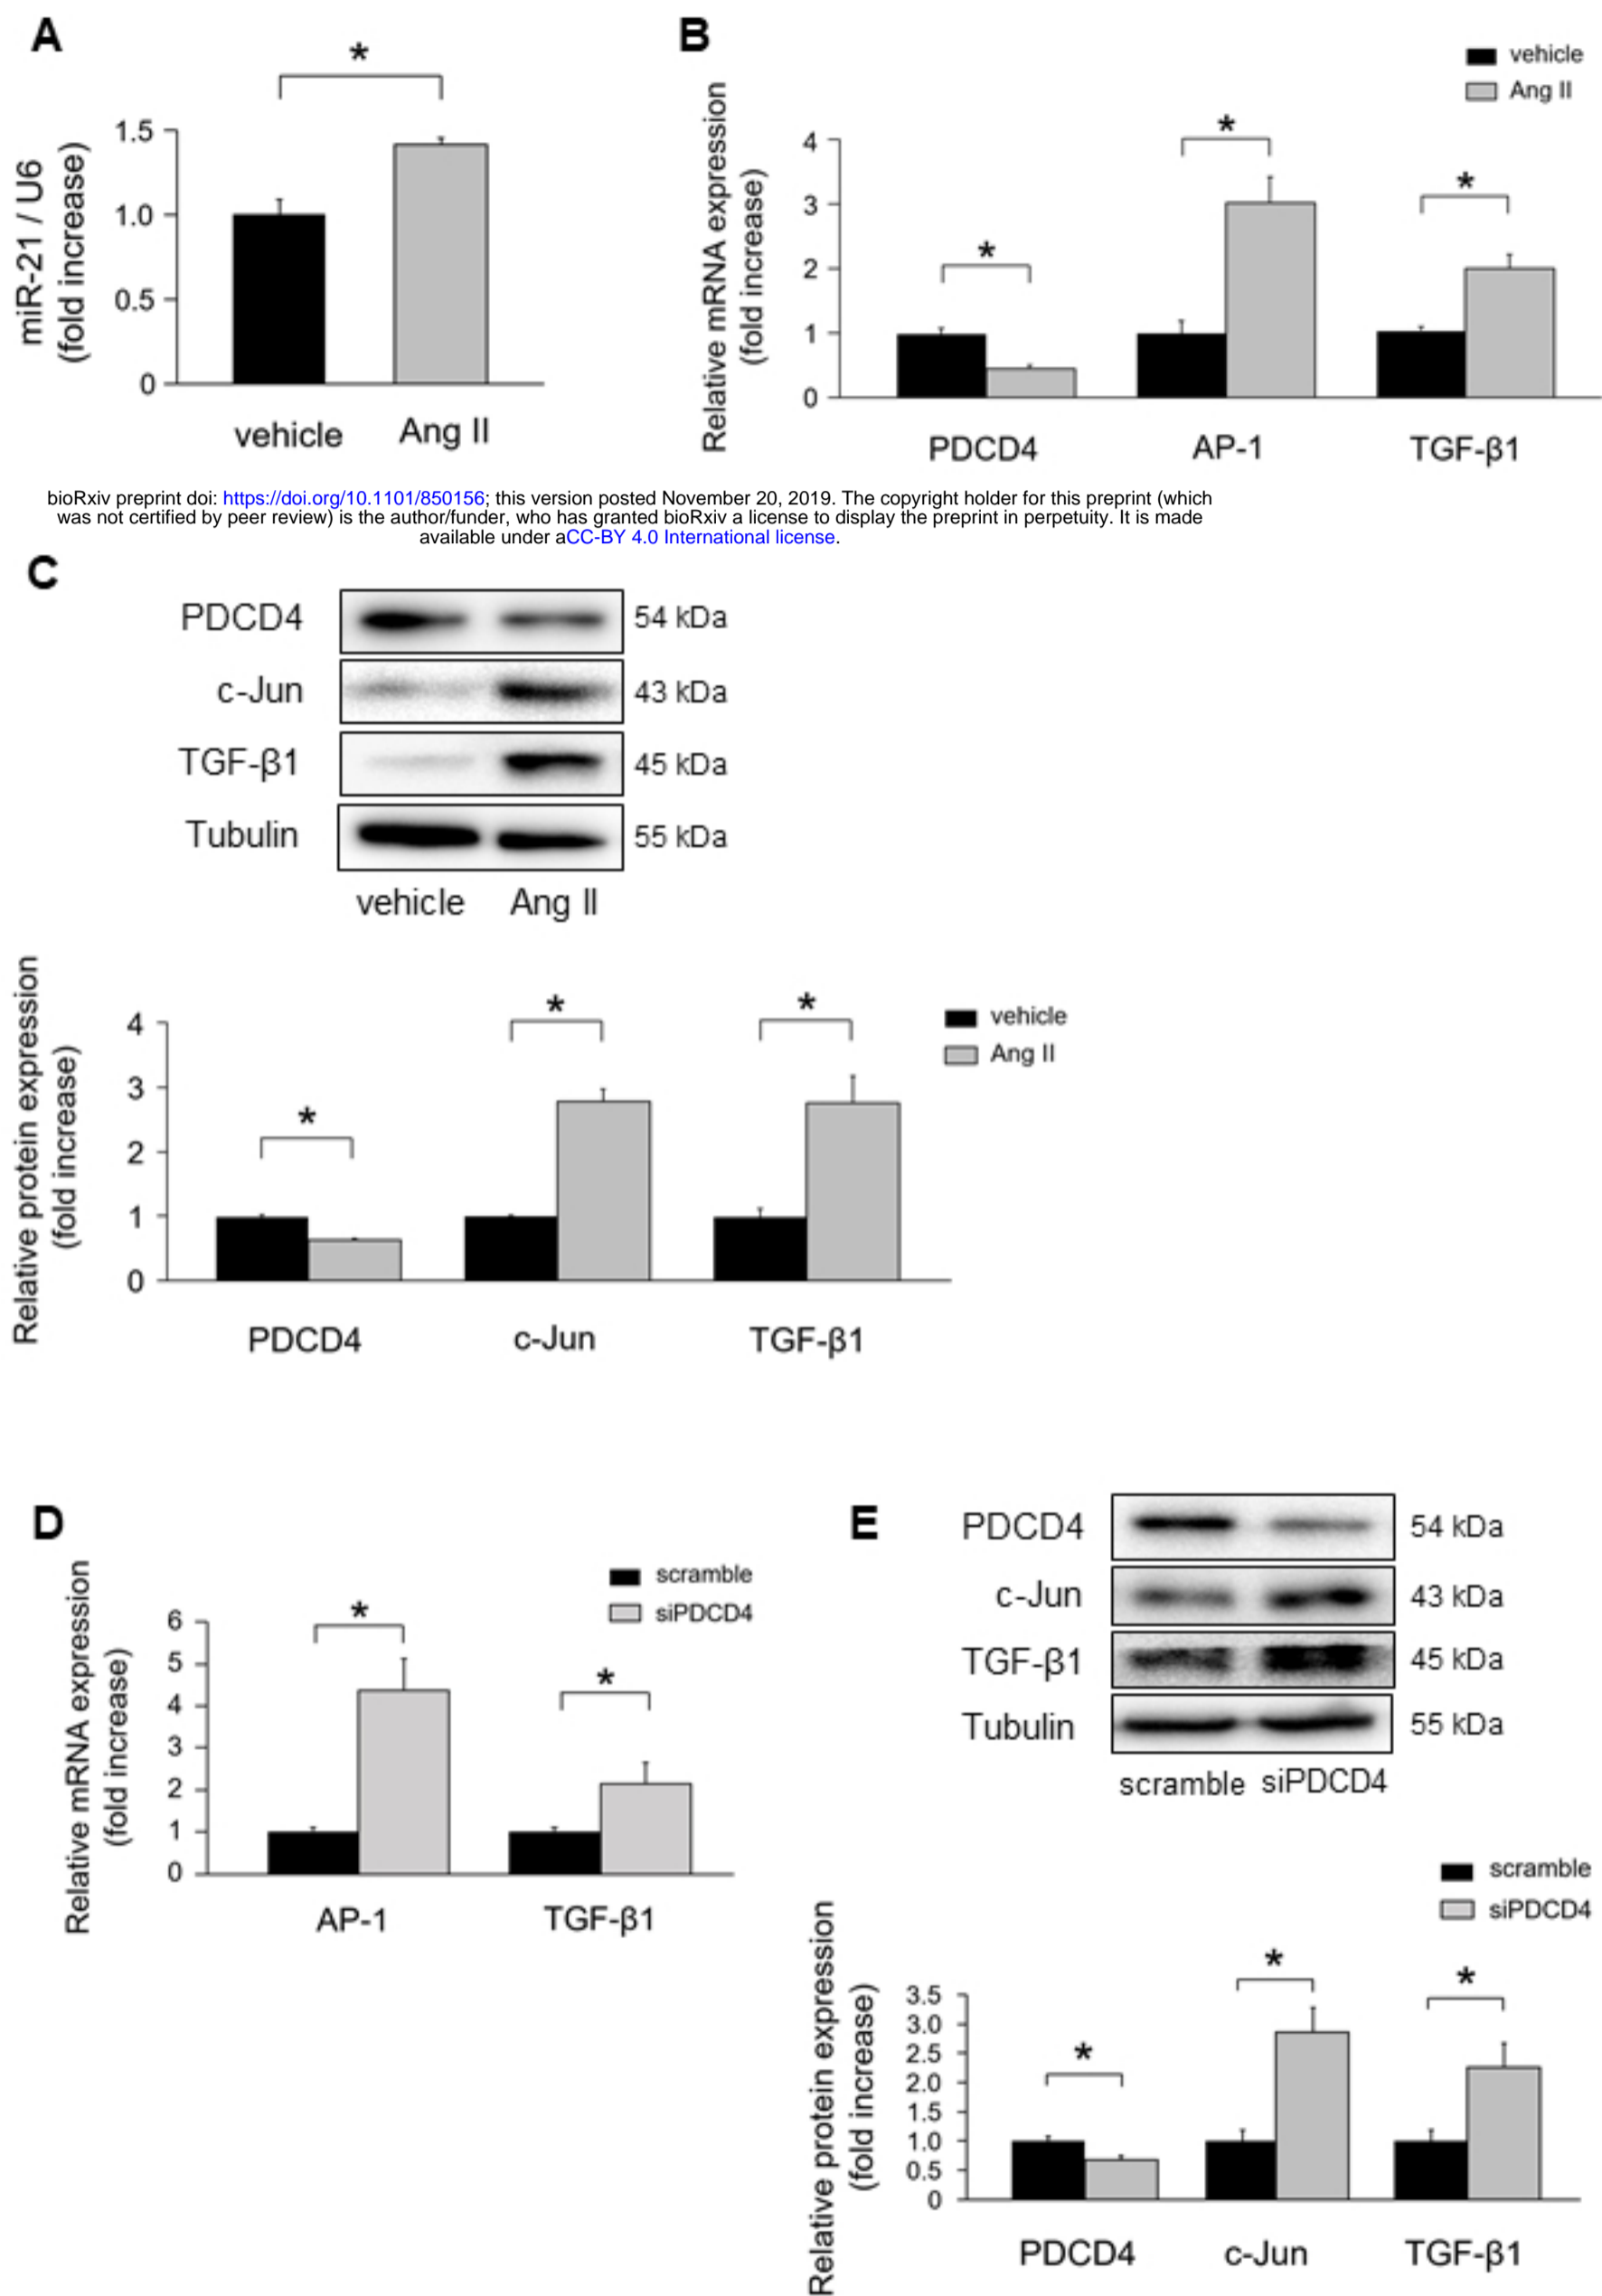

Fig. 4

Fig. 5

**A**

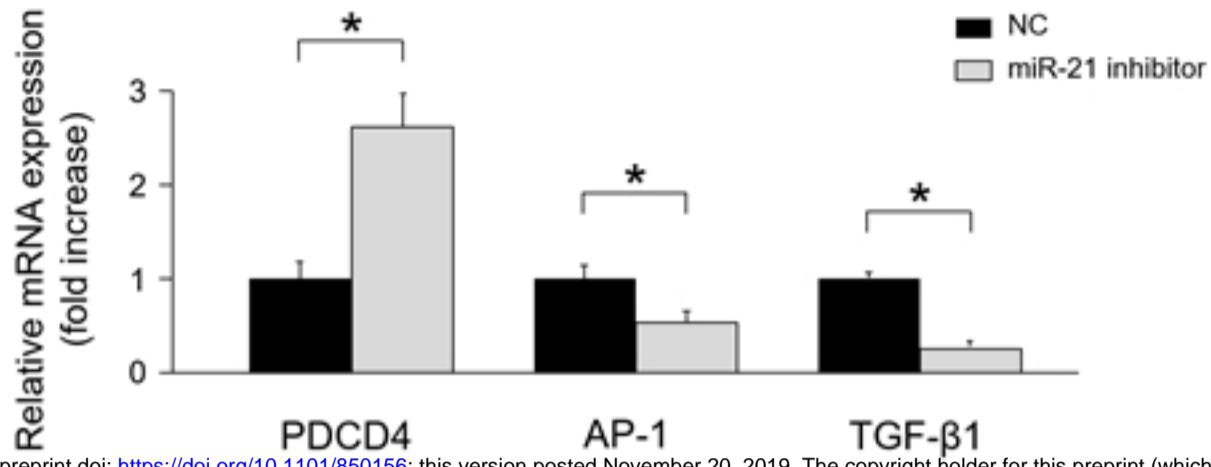

bioRxiv preprint doi: <https://doi.org/10.1101/850156>; this version posted November 20, 2019. The copyright holder for this preprint (which was not certified by peer review) is the author/funder, who has granted bioRxiv a license to display the preprint in perpetuity. It is made available under aCC-BY 4.0 International license.

**B**

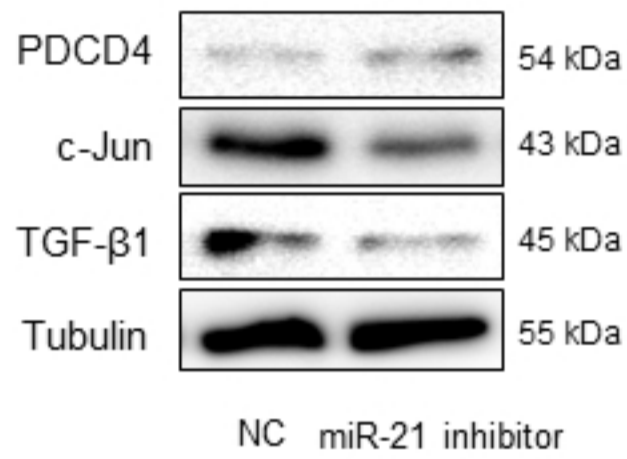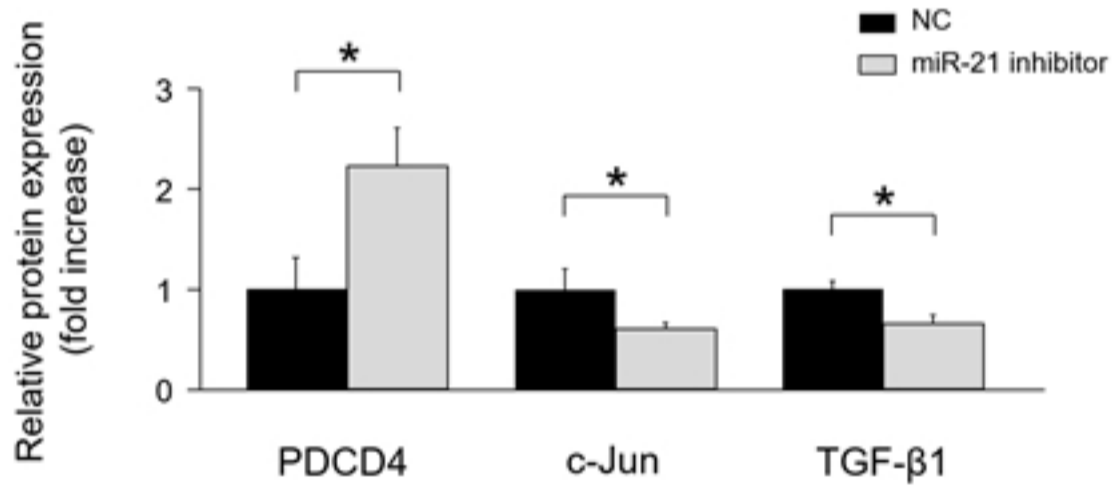

Fig. 5

Fig. 6

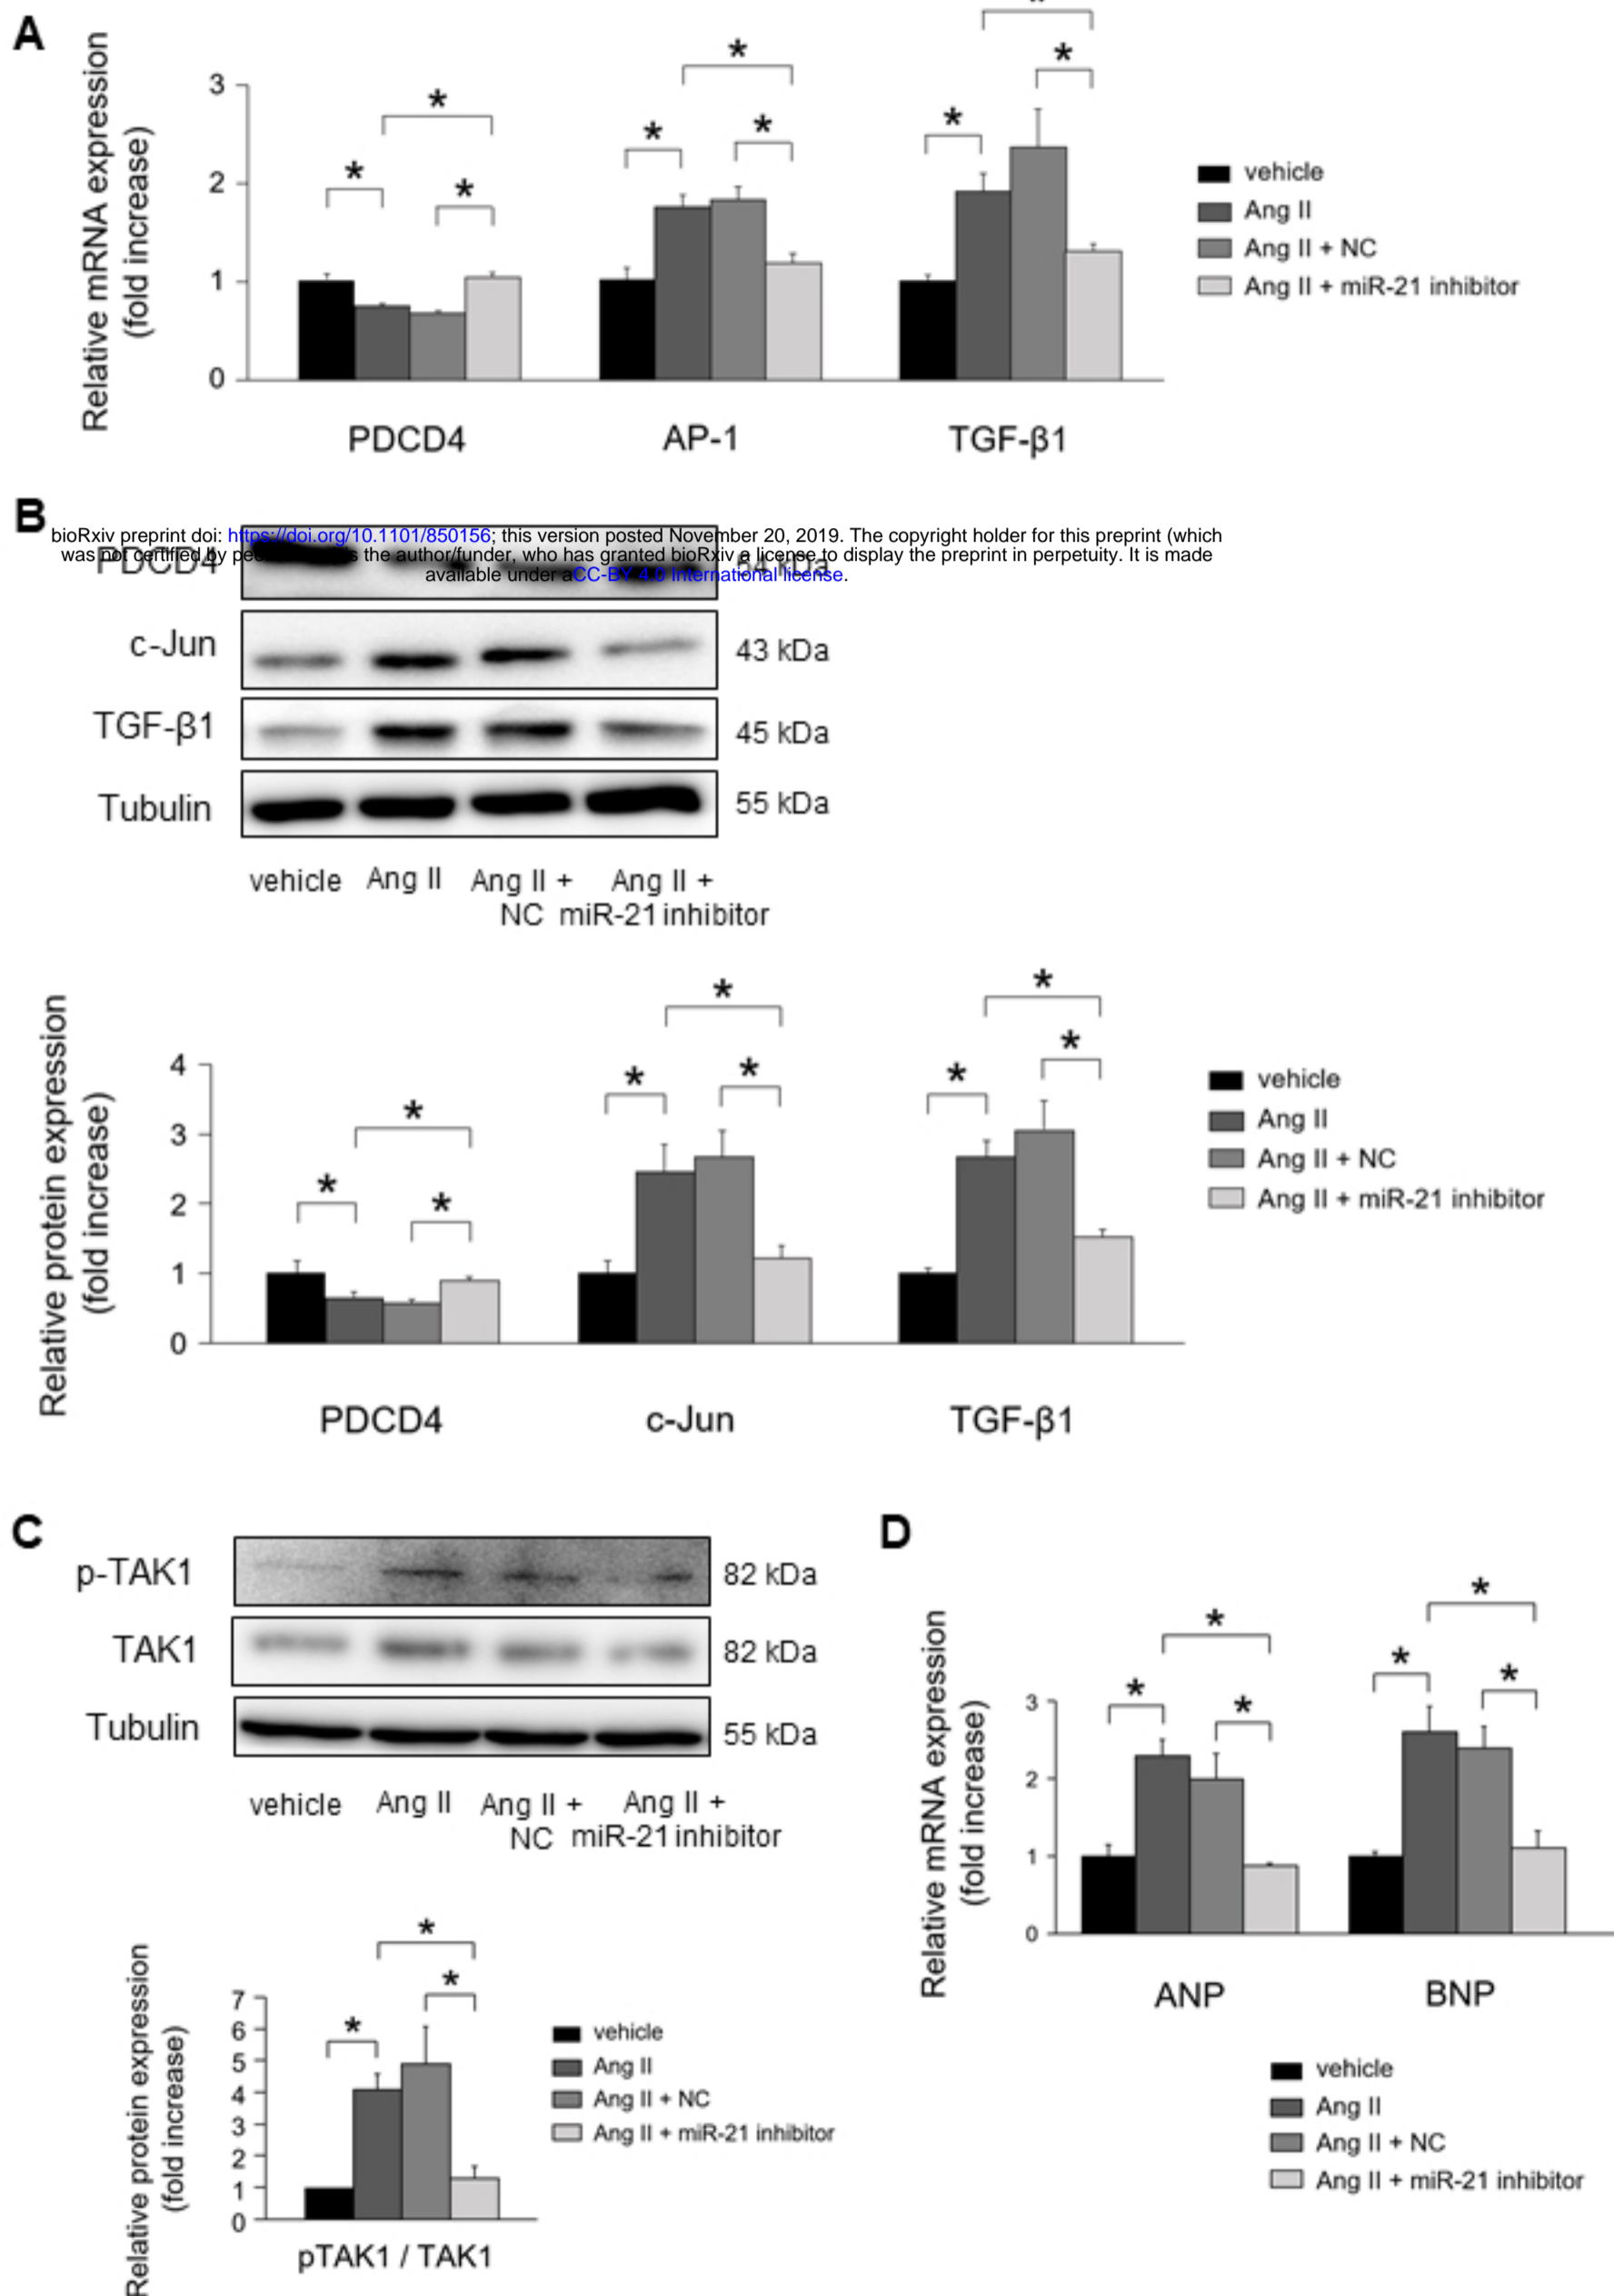

Fig. 6

Fig. 7

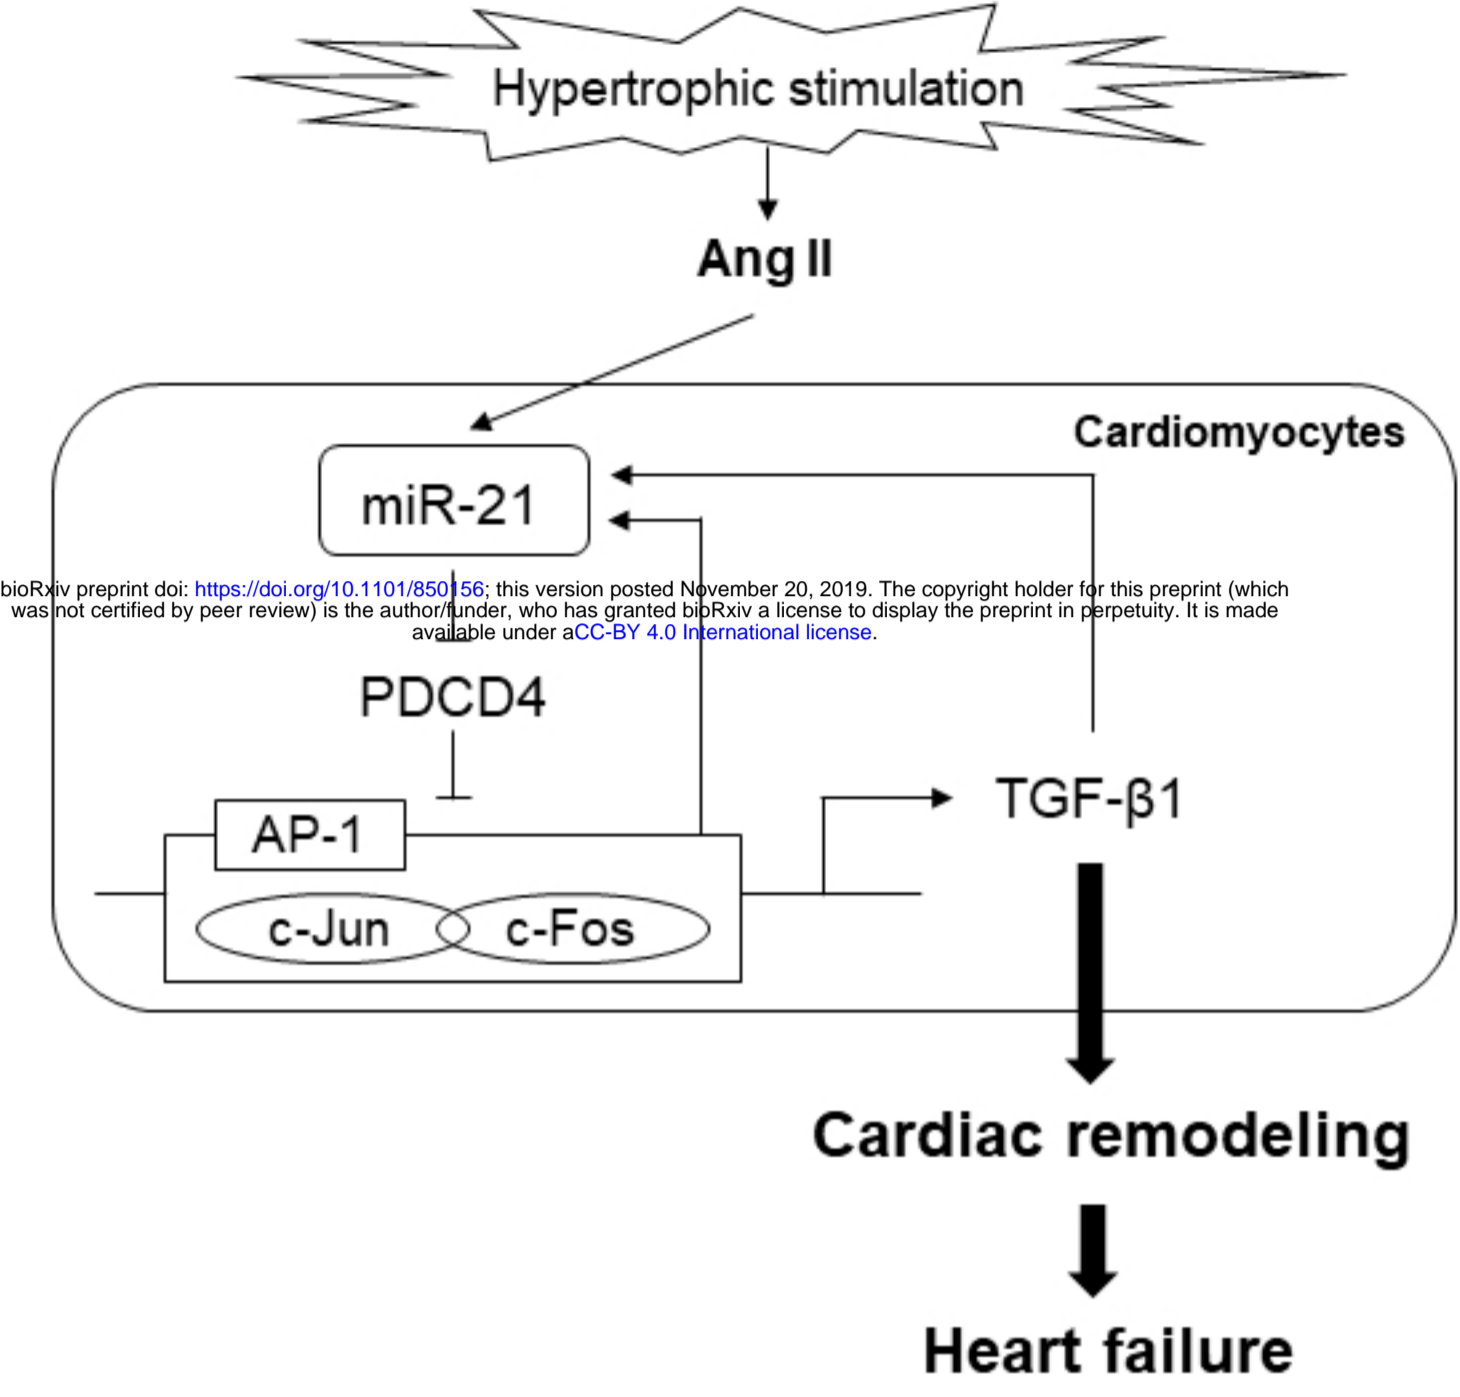

Fig. 7
